# Supplementary material for: Major transcriptional changes observed in the Fulani, an ethnic group less susceptible to malaria
Source: eLife. 2017 Sep 19;6:e29156. doi: 10.7554/eLife.29156 (PMC5629023; doi:10.7554/eLife.29156)
Supplement: Figure 3—source data 1. [file elife-29156-fig3-data1.xlsx]

## Sheet: Figure 3 - Source data 1 
QRT-PCR analysis of DE genes in validation cohort (delta-delta-CT)
		Normalised to Mossi					Normalised to -P.fal
		- P.fal		+ P.fal			Mossi		Fulani
Gene		Mean	SD	Mean	SD		Mean	SD	Mean	SD
STRA13		1.0841	0.53685	1.07191	0.389415		1.03818	0.165652	1.02651	0.372921
OSM		1.03796	0.215574	0.591543	0.178252		1.32346	0.52362	0.754251	0.227281
TOLLIP		1.28493	0.238611	0.713268	0.189152		1.20156	0.204185	0.66699	0.17688
IRF3		2.67087	0.858323	1.03986	0.286073		2.12673	0.52764	0.828005	0.227791
IRF5		1.33312	0.592792	0.61076	0.138928		1.56481	0.870852	0.716908	0.163074
RFXANK		1.03983	0.174337	1.06799	0.268858		1.00971	0.0983699	1.03706	0.26107
FURIN		0.978389	0.124098	0.625253	0.185561		1.19128	0.229142	0.761305	0.225938
TRAF7		1.52495	0.285892	1.11718	0.30842		1.24666	0.219729	0.913307	0.252136
DUSP8		1.43768	0.793154	1.38504	0.201941		0.744405	0.233871	0.71715	0.104562
SQSTM1		1.10565	0.351439	0.846239	0.171202		0.882426	0.0948772	0.67539	0.136638
NFKBIE		1.18038	0.331557	1.16285	0.271622		1.05693	0.313315	1.04123	0.243214
FES		1.66833	0.489826	1.04541	0.149864		1.56982	0.239951	0.983684	0.141015
ARID3A		1.51517	0.312774	0.786328	0.129314		1.63351	0.521423	0.847743	0.139414
GAA		2.17707	0.516156	0.655452	0.170735		1.71316	0.534573	0.515783	0.134353
ALDOA		1.09591	0.148902	1.08115	0.196453		0.956412	0.171052	0.943531	0.171447
GAPDH		1.06847	0.242674	1.01855	0.286531		0.789531	0.403984	0.752644	0.211727
