# Supplementary material for: Major transcriptional changes observed in the Fulani, an ethnic group less susceptible to malaria
Source: eLife. 2017 Sep 19;6:e29156. doi: 10.7554/eLife.29156 (PMC5629023; doi:10.7554/eLife.29156)
Supplement: Figure 4—source data 1. [file elife-29156-fig4-data1.xlsx]

## Sheet: Figure 4 - Source data 1
QRT-PCR analysis of DE genes in validation cohort (delta-delta-CT)
		Normalised to Mossi					Normalised to -P.fal
		- P.fal		+ P.fal			Mossi		Fulani
Gene		Mean	SD	Mean	SD		Mean	SD	Mean	SD
SETD1A		1.39041	0.277606	0.97402	0.289049		1.30077	0.40924	0.911228	0.270415
CXXC1		1.13156	0.226262	0.973437	0.205355		1.16996	0.196749	1.00647	0.212324
KDM4B		1.28963	0.299946	0.749173	0.0518644		1.49716	0.355098	0.86973	0.0602104
KDM6B		2.90451	1.806	1.08229	0.514732		1.34296	0.400015	0.500421	0.237997
BRG1		1.45158	0.68845	0.87378	0.232964		1.80536	0.328455	1.08674	0.289743
RUVBL2		1.06892	0.390378	0.968346	0.287109		1.18433	0.179471	1.0729	0.318108
SUV39H1		1.46229	0.586743	0.806259	0.139897		1.53037	0.69046	0.843796	0.14641
SIRT7		1.04524	0.366912	0.898361	0.193904		1.09009	0.309475	0.936909	0.202225
PHC2		0.992672	0.312558	0.730656	0.184725		1.4959	0.531071	1.10106	0.27837
PPP4C		1.23876	0.209401	0.980584	0.216134		1.06984	0.328675	0.846866	0.186661
