# Supplementary material for: Major transcriptional changes observed in the Fulani, an ethnic group less susceptible to malaria
Source: eLife. 2017 Sep 19;6:e29156. doi: 10.7554/eLife.29156 (PMC5629023; doi:10.7554/eLife.29156)
Supplement: Supplementary file 1. — (A) Significantly differentially DNA methylated genes in monocytes of Fulani -P.fal relative to Mossi –P.fal. (B) Significantly differentially DNA methylated genes in monocytes of Fulani +P.fal relative to Fulani –P.fal. [file elife-29156-supp1.xlsx]

## Sheet: A.Fulani +P.fal v Fulani -P.fal
Ensembl gene ID	Chr	Start	Gene symbol	log2FC	Adjusted p-value		A. Significantly DE genes in Fulani +P.fal relative to Fulani –P.fal.
ENSG00000187778	12	49556544	MCRS1	-1.61471	0.00284469
ENSG00000142409	19	56087366	ZNF787	-1.62613	0.00284469
ENSG00000164081	3	51662693	TEX264	-1.79829	0.00284469
ENSG00000148343	9	129036621	FAM73B	-2.23781	0.00284469
ENSG00000117480	1	46394265	FAAH	-2.94511	0.00284469
ENSG00000169689	17	82018702	STRA13	-3.05044	0.00284469
ENSG00000224870	1	1399522		-4.32465	0.00284469
ENSG00000100056	22	19130279	DGCR14	-1.65338	0.00304987
ENSG00000170619	8	144841042	COMMD5	-1.14781	0.00321821
ENSG00000123136	19	14408819	DDX39A	-1.52697	0.0035029
ENSG00000179094	17	8140472	PER1	-2.06134	0.0035029
ENSG00000119777	2	27032910	TMEM214	-1.11298	0.00373437
ENSG00000161011	5	179806398	SQSTM1	-1.1911	0.00373437
ENSG00000188229	9	137241213	TUBB4B	-1.96971	0.00373437
ENSG00000117984	11	1752752	CTSD	-2.16348	0.00373437
ENSG00000142186	11	65525077	SCYL1	-2.18491	0.00373437
ENSG00000105352	19	41618971	CEACAM4	-2.44178	0.00373437
ENSG00000196544	17	8188333	C17orf59	-2.82216	0.00373437
ENSG00000099899	22	20111866	TRMT2A	-2.87947	0.00373437
ENSG00000185085	11	62646848	INTS5	-2.27742	0.00374171
ENSG00000167118	9	128371319	URM1	-1.3234	0.00384293
ENSG00000148308	9	133030675	GTF3C5	-1.44776	0.00389267
ENSG00000149182	11	47164299	ARFGAP2	-1.01234	0.00398872
ENSG00000164877	7	1428465	MICALL2	-2.46402	0.00440639
ENSG00000169727	17	82050691	GPS1	-2.67203	0.00454934
ENSG00000167965	16	2204248	MLST8	-3.50609	0.00454934
ENSG00000187147	1	44405194	RNF220	-1.12964	0.00456438
ENSG00000130598	11	1838989	TNNI2	-2.64013	0.00456438
ENSG00000267102	17	35409602		-2.25905	0.00489566
ENSG00000116017	19	925781	ARID3A	-1.38974	0.00499586
ENSG00000105656	19	18442663	ELL	-1.41628	0.00499586
ENSG00000005007	19	18831938	UPF1	-1.57177	0.00525707
ENSG00000242372	20	35278907	EIF6	-1.48899	0.00555579
ENSG00000177674	1	11736084	AGTRAP	-1.62301	0.00555579
ENSG00000110651	11	2376177	CD81	-2.12264	0.00555579
ENSG00000160404	9	127731524	TOR2A	-2.23467	0.00570306
ENSG00000106948	9	114334156	AKNA	-1.07022	0.00584625
ENSG00000149923	16	30075978	PPP4C	-1.49229	0.00623958
ENSG00000269335	X	154541199	IKBKG	-1.67231	0.00623958
ENSG00000168701	16	67227103	TMEM208	-1.70823	0.00623958
ENSG00000130475	19	17747718	FCHO1	-1.9893	0.00628615
ENSG00000205250	16	67192169	E2F4	-1.42678	0.00652013
ENSG00000083845	19	58386400	RPS5	-1.5651	0.00652013
ENSG00000169976	6	144094881	SF3B5	-1.80974	0.00652013
ENSG00000166189	10	102065390	HPS6	-2.65039	0.00652013
ENSG00000135905	2	224765090	DOCK10	0.766185	0.00744863
ENSG00000100982	20	45934628	PCIF1	-1.11862	0.00744863
ENSG00000125734	19	6729914	GPR108	-1.44583	0.00744863
ENSG00000126391	11	65386599	FRMD8	-1.66757	0.00744863
ENSG00000167674	19	4472287		-1.75871	0.00744863
ENSG00000099381	16	30957294	SETD1A	-1.93459	0.00744863
ENSG00000115325	2	74549026	DOK1	-2.09357	0.00744863
ENSG00000084207	11	67583595	GSTP1	-2.2443	0.00744863
ENSG00000140368	15	76993359	PSTPIP1	-2.30232	0.00744863
ENSG00000181513	17	45132600	ACBD4	-2.70461	0.00744863
ENSG00000197976	X	1591593	AKAP17A	-1.13818	0.00758414
ENSG00000116670	1	11674480	MAD2L2	-1.69794	0.00758414
ENSG00000154832	18	50282343	CXXC1	-1.73657	0.00758414
ENSG00000187840	8	38030341	EIF4EBP1	-1.92168	0.00758414
ENSG00000161179	22	21628089	YDJC	-2.2114	0.00758414
ENSG00000235848	2	37949911	RMDN2-AS1	1.89614	0.0079575
ENSG00000179335	15	74598500	CLK3	-0.96708	0.0079575
ENSG00000129933	19	19320681	MAU2	-1.24967	0.0079575
ENSG00000100038	22	21957025	TOP3B	-1.58718	0.0079575
ENSG00000163874	1	37474552	ZC3H12A	-1.67574	0.0079575
ENSG00000184545	11	1554044	DUSP8	-1.78753	0.0079575
ENSG00000167967	16	2223566	E4F1	-2.42822	0.0079575
ENSG00000261236	8	144262102	BOP1	-3.22508	0.0079575
ENSG00000171943	1	121184810	SRGAP2C	0.835129	0.0080375
ENSG00000135723	16	67229387	FHOD1	-1.34629	0.0080375
ENSG00000137106	9	37422666	GRHPR	-1.38756	0.0080375
ENSG00000015285	X	48676596	WAS	-1.49969	0.0080375
ENSG00000101199	20	63272785	ARFGAP1	-1.88061	0.0080375
ENSG00000172890	11	71453109	NADSYN1	-1.31215	0.00820935
ENSG00000250061	5	163012265		1.17403	0.00837725
ENSG00000182199	12	57229327	SHMT2	-1.21133	0.00837725
ENSG00000151176	12	113358566	PLBD2	-1.30506	0.00837725
ENSG00000130726	19	58544091	TRIM28	-1.34108	0.00837725
ENSG00000100139	22	37905657	MICALL1	-1.47628	0.00837725
ENSG00000172534	X	153947553	HCFC1	-1.48517	0.00837725
ENSG00000179950	8	143816344	PUF60	-1.63669	0.00837725
ENSG00000177666	11	818902	PNPLA2	-1.79128	0.00837725
ENSG00000179091	8	144095027	CYC1	-1.80628	0.00837725
ENSG00000126522	7	66075798	ASL	-1.81915	0.00837725
ENSG00000131653	16	2155698	TRAF7	-1.94648	0.00837725
ENSG00000153406	16	4461680	NMRAL1	-2.00362	0.00837725
ENSG00000064490	19	19192229	RFXANK	-2.14936	0.00837725
ENSG00000116691	1	12019466	MIIP	-2.24478	0.00837725
ENSG00000175573	11	65916808	C11orf68	-2.32947	0.00837725
ENSG00000130244	19	38403135	FAM98C	-2.41044	0.00837725
ENSG00000182511	15	90883695	FES	-2.71297	0.00837725
ENSG00000138772	4	78551519	ANXA3	2.40953	0.00843451
ENSG00000183091	2	151485336	NEB	1.4677	0.00843451
ENSG00000265943	18	22699481		1.16228	0.00843451
ENSG00000169813	10	43385617	HNRNPF	-0.731068	0.00843451
ENSG00000198728	10	102107560	LDB1	-0.887286	0.00843451
ENSG00000124299	19	33386950	PEPD	-1.12013	0.00843451
ENSG00000269220	22	17777322	LINC00528	-1.12405	0.00843451
ENSG00000148335	9	129608884	NTMT1	-1.16989	0.00843451
ENSG00000127948	7	75899200	POR	-1.27702	0.00843451
ENSG00000136942	9	124857880	RPL35	-1.68541	0.00843451
ENSG00000167566	12	49791146	NCKAP5L	-1.99491	0.00843451
ENSG00000167716	17	1716523	WDR81	-2.03346	0.00843451
ENSG00000104897	19	2236504	SF3A2	-2.11015	0.00843451
ENSG00000103495	16	29806106	MAZ	-2.13148	0.00843451
ENSG00000011132	19	3750819	APBA3	-2.49555	0.00843451
ENSG00000172046	3	49108046	USP19	-1.30551	0.00850519
ENSG00000267109	17	70312831		1.26493	0.00851658
ENSG00000205937	16	2253116	RNPS1	-1.05845	0.00851658
ENSG00000106246	7	99416739	PTCD1	-2.98308	0.00851658
ENSG00000163931	3	53224707	TKT	-1.83859	0.00868448
ENSG00000126368	17	40092787	NR1D1	-1.86507	0.00874301
ENSG00000277075	6	26216975	HIST1H2AE	-3.16221	0.00874301
ENSG00000173020	11	67266410	ADRBK1	-1.8644	0.00875838
ENSG00000182168	4	95162504	UNC5C	2.38352	0.00886034
ENSG00000101773	18	22798261	RBBP8	1.01787	0.00886034
ENSG00000069998	22	17137511	CECR5	-1.80264	0.00886034
ENSG00000171298	17	80101556	GAA	-2.39778	0.00886034
ENSG00000011304	19	797075	PTBP1	-1.22348	0.00891058
ENSG00000116863	1	36088875	ADPRHL2	-1.37121	0.00891058
ENSG00000131165	16	89644431	CHMP1A	-1.79758	0.00891058
ENSG00000104884	19	45349837	ERCC2	-1.93659	0.00891058
ENSG00000131584	1	1292376	ACAP3	-2.06304	0.00891058
ENSG00000172354	7	100673531	GNB2	-2.38093	0.00891058
ENSG00000171223	19	12791496	JUNB	-2.67966	0.00891058
ENSG00000162191	11	62676498	UBXN1	-1.4246	0.00891347
ENSG00000161835	12	52006940	GRASP	-1.47239	0.00891347
ENSG00000140400	15	75355207	MAN2C1	-1.69402	0.00891347
ENSG00000196411	7	100802565	EPHB4	-2.9965	0.00892197
ENSG00000140497	15	74843730	SCAMP2	-0.931295	0.00894718
ENSG00000158528	7	94907202	PPP1R9A	2.66217	0.00902339
ENSG00000099250	10	33177492	NRP1	1.86754	0.00902339
ENSG00000112576	6	41934933	CCND3	-0.865416	0.00902339
ENSG00000101161	20	63981135	PRPF6	-0.910407	0.00902339
ENSG00000146232	6	44258166	NFKBIE	-0.926394	0.00902339
ENSG00000095383	9	98198999	TBC1D2	-0.945556	0.00902339
ENSG00000160695	11	119067692	VPS11	-0.951829	0.00902339
ENSG00000139645	12	56237807	ANKRD52	-1.07974	0.00902339
ENSG00000088038	19	54137728	CNOT3	-1.20859	0.00902339
ENSG00000179632	8	144104499	MAF1	-1.32499	0.00902339
ENSG00000126768	X	48893447	TIMM17B	-1.49965	0.00902339
ENSG00000127554	16	1984207	GFER	-1.60491	0.00902339
ENSG00000149925	16	30053090	ALDOA	-1.72231	0.00902339
ENSG00000107140	9	35605305	TESK1	-1.78917	0.00902339
ENSG00000126062	3	50354749	TMEM115	-2.04381	0.00902339
ENSG00000076984	19	7903843	MAP2K7	-2.23037	0.00902339
ENSG00000159069	9	136940435	FBXW5	-2.75146	0.00902339
ENSG00000180340	17	44557459	FZD2	-6.24712	0.00902339
ENSG00000104946	19	49877425	TBC1D17	-1.41663	0.00906137
ENSG00000142327	2	240565804	RNPEPL1	-2.26937	0.00906137
ENSG00000169223	5	177331562	LMAN2	-1.49274	0.0090657
ENSG00000159720	16	67438014	ATP6V0D1	-0.979716	0.00910359
ENSG00000104979	19	13774168	C19orf53	-1.67495	0.00910359
ENSG00000075213	7	83955777	SEMA3A	1.55837	0.00912964
ENSG00000140521	15	89316305	POLG	-0.812045	0.00912964
ENSG00000214655	10	73785582	ZSWIM8	-1.28778	0.00912964
ENSG00000178038	3	46668997	ALS2CL	-2.43414	0.00912964
ENSG00000140688	16	31489471	C16orf58	-2.03957	0.00917878
ENSG00000235173	8	144137769	HGH1	-2.69967	0.00917878
ENSG00000162430	1	25800176	SEPN1	-1.93873	0.00924262
ENSG00000229017	6	142966421	LINC01277	1.52163	0.00942669
ENSG00000132153	3	47802909	DHX30	-1.43816	0.00942669
ENSG00000103502	16	29858357	CDIPT	-1.57209	0.00942669
ENSG00000215041	17	7315628	NEURL4	-1.57217	0.00942669
ENSG00000115268	19	1438358	RPS15	-1.6029	0.00942669
ENSG00000214160	3	184242301	ALG3	-1.65089	0.00942669
ENSG00000146830	7	100679507	GIGYF1	-1.4442	0.00952993
ENSG00000169738	17	82035136	DCXR	-2.30113	0.00952993
ENSG00000182179	3	49805207	UBA7	-1.39075	0.00962206
ENSG00000178252	3	49007062	WDR6	-1.52215	0.00971427
ENSG00000108591	17	18087886	DRG2	-1.13866	0.00973113
ENSG00000105568	19	52190039	PPP2R1A	-0.757379	0.0100036
ENSG00000071553	X	154428632	ATP6AP1	-0.989256	0.0100036
ENSG00000137207	6	43511827	YIPF3	-1.10608	0.0100036
ENSG00000010322	3	52455118	NISCH	-1.10637	0.0100036
ENSG00000182208	11	1469457	MOB2	-1.12764	0.0100036
ENSG00000163930	3	52401013	BAP1	-1.18659	0.0100036
ENSG00000167670	19	4402662	CHAF1A	-1.26523	0.0100036
ENSG00000072310	17	17810399	SREBF1	-1.32259	0.0100036
ENSG00000140553	15	90930180	UNC45A	-1.57086	0.0100036
ENSG00000076944	19	7636881	STXBP2	-2.10901	0.0100036
ENSG00000198917	9	128819651	C9orf114	-2.37503	0.0100036
ENSG00000100280	22	29327680	AP1B1	-1.27304	0.0100227
ENSG00000006634	7	87876216	DBF4	1.29533	0.0100718
ENSG00000163956	4	3506376	LRPAP1	-1.5774	0.0101201
ENSG00000014216	11	65180566	CAPN1	-1.75882	0.0101201
ENSG00000123892	11	88113242	RAB38	1.39863	0.0102148
ENSG00000123700	17	70168673	KCNJ2	1.26961	0.0102148
ENSG00000183742	7	20134655	MACC1	1.05124	0.0102148
ENSG00000079805	19	10718079	DNM2	-0.915789	0.0102148
ENSG00000100412	22	41469125	ACO2	-1.00753	0.0102148
ENSG00000198909	17	63622415	MAP3K3	-1.02833	0.0102148
ENSG00000034152	17	21284672	MAP2K3	-1.07466	0.0102148
ENSG00000141965	19	4791681	FEM1A	-1.0998	0.0102148
ENSG00000182054	15	90083045	IDH2	-1.12635	0.0102148
ENSG00000142784	1	27234516	WDTC1	-1.21794	0.0102148
ENSG00000104853	19	44954585	CLPTM1	-1.26239	0.0102148
ENSG00000130766	1	28259527	SESN2	-1.2648	0.0102148
ENSG00000132589	17	28879335	FLOT2	-1.29643	0.0102148
ENSG00000123384	12	57128493	LRP1	-1.32117	0.0102148
ENSG00000148331	9	129634604	ASB6	-1.37769	0.0102148
ENSG00000105556	19	301444	MIER2	-1.38796	0.0102148
ENSG00000095321	9	129094810	CRAT	-1.3982	0.0102148
ENSG00000090581	16	1351923	GNPTG	-1.45822	0.0102148
ENSG00000148180	9	121207794	GSN	-1.50599	0.0102148
ENSG00000189306	22	42509968	RRP7A	-1.59633	0.0102148
ENSG00000260942	2	240582700	CAPN10-AS1	-1.76363	0.0102148
ENSG00000107223	9	136862119	EDF1	-1.78693	0.0102148
ENSG00000064932	19	1107636	SBNO2	-1.97188	0.0102148
ENSG00000275074	8	22106872	NUDT18	-2.16758	0.0102148
ENSG00000169692	9	136673143	AGPAT2	-3.09487	0.0102148
ENSG00000146021	5	137617500	KLHL3	2.08977	0.010239
ENSG00000099985	22	30262829	OSM	-1.83594	0.0103016
ENSG00000215305	20	2840703	VPS16	-1.54918	0.0103284
ENSG00000126561	17	42287547	STAT5A	-0.83894	0.0104445
ENSG00000075399	16	89707134	VPS9D1	-1.86793	0.0104445
ENSG00000120913	8	22578279	PDLIM2	-2.79682	0.0105324
ENSG00000161999	16	681671	JMJD8	-2.12203	0.0105413
ENSG00000129682	X	138614731	FGF13	1.99317	0.0105603
ENSG00000177728	17	75441159	KIAA0195	-1.98517	0.0105603
ENSG00000136490	17	63695902	LIMD2	-2.05211	0.0109214
ENSG00000186716	22	23179704	BCR	-0.990041	0.0109471
ENSG00000101945	X	48695554	SUV39H1	-1.69451	0.0109471
ENSG00000188186	7	100148907	LAMTOR4	-1.96585	0.0109471
ENSG00000179115	19	12922479	FARSA	-2.12703	0.0109471
ENSG00000253619	8	120913065		1.85897	0.0110851
ENSG00000107874	10	102423245	CUEDC2	-1.64779	0.0110851
ENSG00000068001	3	50317790	HYAL2	-2.97416	0.0110851
ENSG00000133612	7	151085831	AGAP3	-1.12078	0.0111928
ENSG00000127838	2	218270392	PNKD	-1.64221	0.0111928
ENSG00000104774	19	12646511	MAN2B1	-1.2476	0.0112287
ENSG00000198963	9	74497365	RORB	2.25162	0.0112656
ENSG00000068724	2	46916157	TTC7A	-0.884009	0.0112656
ENSG00000185163	12	132136594	DDX51	-1.2472	0.0112656
ENSG00000178719	8	143990058	GRINA	-1.63477	0.0112656
ENSG00000108840	17	44076746	HDAC5	-1.67401	0.0112656
ENSG00000140564	15	90868592	FURIN	-2.03482	0.0112656
ENSG00000185596	15	101961603	WASH3P	-1.39561	0.0113121
ENSG00000254986	11	66480013	DPP3	-1.479	0.0113121
ENSG00000127054	1	1311585	CPSF3L	-1.61289	0.0113121
ENSG00000127955	7	80133955	GNAI1	1.43508	0.0113264
ENSG00000221978	1	1385711	CCNL2	-0.96274	0.0113264
ENSG00000099849	11	560404	RASSF7	-3.67021	0.0113264
ENSG00000204859	1	6580001	ZBTB48	-1.47125	0.0114069
ENSG00000075303	7	87833568	SLC25A40	0.807518	0.011726
ENSG00000143862	1	202133404	ARL8A	-0.914636	0.011726
ENSG00000100994	20	25248069	PYGB	-1.19531	0.011726
ENSG00000171608	1	9651732	PIK3CD	-1.31998	0.011726
ENSG00000115275	2	74461057	MOGS	-1.57916	0.011726
ENSG00000115085	2	97713560	ZAP70	-2.54718	0.011726
ENSG00000272449	1	2546465		-2.93947	0.0118107
ENSG00000105053	19	49976467	VRK3	-1.0182	0.0120248
ENSG00000274808	17	36165624	TBC1D3B	2.01197	0.0120397
ENSG00000142208	14	104769349	AKT1	-1.70642	0.0120666
ENSG00000198113	9	137277749	TOR4A	-2.12573	0.0120666
ENSG00000180233	7	30284307	ZNRF2	1.16981	0.0120684
ENSG00000104812	19	48968125	GYS1	-1.01516	0.0120684
ENSG00000141568	17	82519713	FOXK2	-1.06172	0.0120684
ENSG00000278771	14	49853616		-1.14618	0.0120684
ENSG00000168763	2	96816245	CNNM3	-1.22573	0.0120684
ENSG00000125817	20	3783851	CENPB	-1.59309	0.0120684
ENSG00000010327	3	52495338	STAB1	-1.88558	0.0120684
ENSG00000108639	17	78168558	SYNGR2	-1.98419	0.0120684
ENSG00000092929	17	75827225	UNC13D	-2.08428	0.0120684
ENSG00000076924	19	7619525	XAB2	-2.13386	0.0120684
ENSG00000160917	7	99438922	CPSF4	-1.33277	0.0121209
ENSG00000164403	5	132822141	SHROOM1	-1.5358	0.0121305
ENSG00000157637	17	81245000	SLC38A10	-2.15101	0.0121669
ENSG00000116213	1	3630767	WRAP73	-1.84064	0.0124234
ENSG00000104529	8	143579697	EEF1D	-1.69802	0.0127124
ENSG00000139637	12	53299686	C12orf10	-1.15623	0.0127345
ENSG00000105122	19	15451624	RASAL3	-1.44896	0.0127345
ENSG00000110711	11	67483041	AIP	-1.89182	0.0127345
ENSG00000101986	X	153724868	ABCD1	-2.12356	0.0127345
ENSG00000167302	17	81228277	ENTHD2	-1.58299	0.0127386
ENSG00000167130	9	129081100	DOLPP1	-1.67284	0.0128258
ENSG00000131759	17	40309192	RARA	-1.08977	0.0128742
ENSG00000010256	3	48599002	UQCRC1	-0.933139	0.0128952
ENSG00000174744	11	66337333	BRMS1	-1.52198	0.0128952
ENSG00000162300	11	65084223	ZFPL1	-1.58477	0.0128952
ENSG00000157014	3	10248023	TATDN2	-1.6245	0.0128952
ENSG00000083838	19	58474017	ZNF446	-2.75005	0.0128952
ENSG00000099991	22	24011192	CABIN1	-0.928492	0.0129355
ENSG00000123064	12	113157174	DDX54	-1.43867	0.0129355
ENSG00000154016	17	19020673	GRAP	-2.02052	0.0129355
ENSG00000278709	20	57710183	NKILA	-2.63359	0.0129355
ENSG00000076662	19	10333776	ICAM3	-1.47059	0.0130102
ENSG00000235782	1	70947379		1.77291	0.013092
ENSG00000182473	17	76081017	EXOC7	-0.918055	0.013092
ENSG00000146094	5	177501907	DOK3	-1.37668	0.013092
ENSG00000142185	21	44350163	TRPM2	-1.37748	0.013092
ENSG00000121680	11	45909669	PEX16	-1.86616	0.013092
ENSG00000173264	11	64270062	GPR137	-1.9137	0.013092
ENSG00000182087	19	1009648	TMEM259	-1.9621	0.013092
ENSG00000198736	16	1938210	MSRB1	-2.13812	0.013092
ENSG00000158062	1	26281328	UBXN11	-1.38459	0.0131603
ENSG00000235568	22	42380410	NFAM1	-1.34156	0.0132245
ENSG00000027847	5	177600100	B4GALT7	-1.52069	0.0133176
ENSG00000103249	16	1444934	CLCN7	-1.73938	0.0133176
ENSG00000122140	9	135499984	MRPS2	-1.90746	0.0133347
ENSG00000172456	1	59296638	FGGY	0.860297	0.0133481
ENSG00000099956	22	23786963	SMARCB1	-1.0109	0.0133481
ENSG00000131475	17	42773436	VPS25	-1.13687	0.0133481
ENSG00000198925	2	219209772	ATG9A	-1.29315	0.0133481
ENSG00000136717	2	127048027	BIN1	-1.33427	0.0133481
ENSG00000067829	X	153785766	IDH3G	-1.39346	0.0133481
ENSG00000104894	19	49335171	CD37	-1.40203	0.0133481
ENSG00000102103	X	48897912	PQBP1	-1.4148	0.0133481
ENSG00000033100	7	151232489	CHPF2	-1.45021	0.0133481
ENSG00000116663	1	11664124	FBXO6	-1.63159	0.0133481
ENSG00000184164	22	49918167	CRELD2	-1.66261	0.0133481
ENSG00000013810	4	1721490	TACC3	-1.66988	0.0133481
ENSG00000130706	20	62302093	ADRM1	-1.66994	0.0133481
ENSG00000198931	16	88809339	APRT	-2.10052	0.0133481
ENSG00000077312	19	40750637	SNRPA	-1.07007	0.013403
ENSG00000130811	19	10115017	EIF3G	-1.26706	0.013403
ENSG00000148297	9	133338323	MED22	-1.58196	0.0134183
ENSG00000167470	19	1248553	MIDN	-1.53629	0.013527
ENSG00000167747	19	50797704	C19orf48	-2.17066	0.013527
ENSG00000079999	19	10486120	KEAP1	-1.40734	0.0135365
ENSG00000126759	X	47624213	CFP	-1.83493	0.0135365
ENSG00000119535	1	36466043	CSF3R	-1.16965	0.0135382
ENSG00000102901	16	67828157	CENPT	-1.55711	0.0135382
ENSG00000160570	19	42198598	DEDD2	-1.11374	0.0135878
ENSG00000171302	17	78991717	CANT1	-1.00072	0.0136054
ENSG00000149091	11	46332905	DGKZ	-1.54125	0.0136054
ENSG00000202198	6	52995620	RN7SK	-1.55981	0.0136054
ENSG00000247765	15	21298233		2.97714	0.0136332
ENSG00000125384	14	52314305	PTGER2	0.758589	0.0136332
ENSG00000108298	17	39200283	RPL19	-1.19118	0.0136332
ENSG00000101997	X	49235467	CCDC22	-1.69872	0.0136332
ENSG00000126464	19	49591643	PRR12	-1.7984	0.0136332
ENSG00000100241	22	50445000	SBF1	-2.47146	0.0136332
ENSG00000125637	2	113157325	PSD4	-1.41116	0.0136625
ENSG00000102032	X	153935263	RENBP	-1.71313	0.0137065
ENSG00000242802	7	4775622	AP5Z1	-1.28202	0.0137244
ENSG00000151012	4	138164097	SLC7A11	1.98249	0.0137389
ENSG00000224649	21	29182027		1.24344	0.0137389
ENSG00000124155	20	45416077	PIGT	-0.867323	0.0137389
ENSG00000196998	X	49074433	WDR45	-1.09333	0.0137389
ENSG00000274180	17	21238870	NATD1	-1.50094	0.0137389
ENSG00000161395	17	39671122	PGAP3	-1.50652	0.0137389
ENSG00000101444	20	34280268	AHCY	-1.55142	0.0137389
ENSG00000107738	10	71747559	C10orf54	-1.55579	0.0137389
ENSG00000204388	6	31827735	HSPA1B	-4.03498	0.0137389
ENSG00000117410	1	43974487	ATP6V0B	-1.1027	0.0139173
ENSG00000099804	19	531712	CDC34	-1.58254	0.0139505
ENSG00000158555	11	75434640	GDPD5	-1.72708	0.0139505
ENSG00000160111	19	16892947	CPAMD8	-1.33385	0.0140049
ENSG00000140691	16	31458080	ARMC5	-2.04488	0.0140049
ENSG00000140854	16	57735730	KATNB1	-2.11854	0.0140049
ENSG00000128185	22	20314276	DGCR6L	-2.59531	0.0140049
ENSG00000177370	17	997117	TIMM22	-1.27731	0.0140379
ENSG00000168237	3	52287089	GLYCTK	-1.4465	0.0140379
ENSG00000063244	19	55654146	U2AF2	-1.47315	0.0140379
ENSG00000130640	10	133278630	TUBGCP2	-0.971831	0.0144781
ENSG00000187531	17	81911939	SIRT7	-1.61549	0.0144781
ENSG00000101439	20	23626706	CST3	-1.72483	0.0144781
ENSG00000179862	1	40861051	CITED4	-3.13421	0.0144781
ENSG00000090238	16	30092314	YPEL3	-1.5447	0.0145474
ENSG00000140931	16	66603874	CMTM3	-0.725508	0.0145534
ENSG00000091542	17	18183078	ALKBH5	-0.746388	0.0145534
ENSG00000127616	19	10961001	SMARCA4	-1.07906	0.0145534
ENSG00000127445	19	9835257	PIN1	-1.7181	0.0145534
ENSG00000105676	19	19033575	ARMC6	-2.19831	0.0145534
ENSG00000162032	16	1776712	SPSB3	-2.36355	0.0145534
ENSG00000185624	17	81843159	P4HB	-0.862976	0.0146221
ENSG00000157020	3	10293131	SEC13	-0.958999	0.0146767
ENSG00000111640	12	6533927	GAPDH	-1.06239	0.0146767
ENSG00000129465	14	24336021	RIPK3	-1.28557	0.0146767
ENSG00000127837	2	218264123	AAMP	-1.46366	0.0146767
ENSG00000178927	17	82442589	C17orf62	-1.59654	0.0146767
ENSG00000104915	19	13144058	STX10	-1.61185	0.0146767
ENSG00000110057	11	67991104	UNC93B1	-1.79945	0.0146767
ENSG00000132024	19	13906201	CC2D1A	-1.88515	0.0146767
ENSG00000164880	7	1470277	INTS1	-2.29506	0.0146767
ENSG00000159111	17	47823272	MRPL10	-0.823336	0.0147216
ENSG00000175931	17	76389451	UBE2O	-1.0921	0.0147216
ENSG00000196502	16	28605196	SULT1A1	-1.55424	0.0147216
ENSG00000148334	9	128120693	PTGES2	-2.0138	0.0147216
ENSG00000132361	17	2689386	CLUH	-2.10774	0.0147216
ENSG00000163050	1	226897536	ADCK3	-0.863055	0.0148134
ENSG00000154678	7	31751179	PDE1C	1.43379	0.0148344
ENSG00000161847	19	10316212	RAVER1	-1.84914	0.0148549
ENSG00000141556	17	82752064	TBCD	-1.00448	0.0148601
ENSG00000141985	19	4360370	SH3GL1	-1.39627	0.0148601
ENSG00000162650	1	109483479	ATXN7L2	-1.47051	0.0148601
ENSG00000064961	19	3572777	HMG20B	-1.61889	0.0148601
ENSG00000105640	19	17859876	RPL18A	-1.54241	0.0149587
ENSG00000213445	11	65585395	SIPA1	-1.85337	0.0149587
ENSG00000106244	7	99392048	PDAP1	-1.03077	0.0150147
ENSG00000157873	1	2555639	TNFRSF14	-1.79656	0.0150147
ENSG00000173486	11	64241003	FKBP2	-1.46375	0.0150321
ENSG00000181789	3	129249606	COPG1	-0.735045	0.0150341
ENSG00000100949	14	24265538	RABGGTA	-1.59416	0.0150341
ENSG00000104081	15	40087890	BMF	-0.871777	0.0151733
ENSG00000157554	21	38380027	ERG	1.37468	0.0153018
ENSG00000196235	19	39436156	SUPT5H	-0.773433	0.0153263
ENSG00000196230	6	30720201	TUBB	-0.788605	0.0153263
ENSG00000167173	15	75195643	C15orf39	-1.29537	0.0153263
ENSG00000148719	10	72332830	DNAJB12	-0.78815	0.0153687
ENSG00000078808	1	1216908	SDF4	-1.859	0.0153711
ENSG00000128283	22	37560447	CDC42EP1	-4.21021	0.0154587
ENSG00000103549	16	30761745	RNF40	-1.26584	0.0155433
ENSG00000270069	X	45745211	MIR222HG	1.10332	0.0156948
ENSG00000142002	19	4675224	DPP9	-1.1694	0.0156948
ENSG00000225697	3	48625723	SLC26A6	-1.19649	0.0156948
ENSG00000006062	17	45263121	MAP3K14	-1.27244	0.0156948
ENSG00000110876	12	108622277	SELPLG	-1.63708	0.0156948
ENSG00000130733	19	10922185	YIPF2	-1.8257	0.0156948
ENSG00000107518	10	115093365	ATRNL1	1.73787	0.0158095
ENSG00000158941	8	22604632	CCAR2	-0.833843	0.0158095
ENSG00000204843	2	74361154	DCTN1	-1.07848	0.0158095
ENSG00000148288	9	133152948	GBGT1	-1.55178	0.0158095
ENSG00000214253	7	101239458	FIS1	-1.40505	0.015812
ENSG00000108819	17	50133735	PPP1R9B	-1.34903	0.0158653
ENSG00000162374	1	50048014	ELAVL4	1.82546	0.015866
ENSG00000178467	3	48989886	P4HTM	-1.52665	0.015866
ENSG00000096080	6	43671303	MRPS18A	-0.826053	0.0158791
ENSG00000160211	X	154531391	G6PD	-1.59621	0.0158791
ENSG00000100345	22	36281281	MYH9	-1.00111	0.0158927
ENSG00000184840	5	177592158	TMED9	-1.01948	0.0159389
ENSG00000167395	16	31074422	ZNF646	-1.11481	0.0159389
ENSG00000160688	1	154983338	FLAD1	-1.5663	0.0160589
ENSG00000224086	22	21938293		-1.15671	0.0161629
ENSG00000149743	11	64223799	TRPT1	-1.57048	0.0161629
ENSG00000105671	19	18919675	DDX49	-1.71509	0.0161629
ENSG00000063241	19	55452985	ISOC2	-2.72363	0.0162956
ENSG00000151773	13	43823909	CCDC122	0.906343	0.0163697
ENSG00000149798	11	65314818	CDC42EP2	-1.80652	0.0163697
ENSG00000110436	11	35251206	SLC1A2	0.839022	0.0165907
ENSG00000078902	11	1274371	TOLLIP	-0.964102	0.0165907
ENSG00000144579	2	218398256	CTDSP1	-1.49093	0.0166191
ENSG00000069424	1	5991466	KCNAB2	-0.920358	0.0166903
ENSG00000177600	11	809647	RPLP2	-1.14307	0.0166903
ENSG00000141012	16	88813734	GALNS	-1.28259	0.0166903
ENSG00000140264	15	43777087	SERF2	-1.3387	0.0167151
ENSG00000134686	1	33323623	PHC2	-0.90116	0.0167553
ENSG00000008838	17	40019097	MED24	-1.0482	0.0167553
ENSG00000175220	11	46677080	ARHGAP1	-1.22124	0.0167553
ENSG00000004399	3	129555175	PLXND1	-1.42275	0.0167553
ENSG00000168071	11	64340223	CCDC88B	-1.80378	0.0167553
ENSG00000130255	19	5674947	RPL36	-1.85933	0.0167553
ENSG00000126254	19	35629030	RBM42	-1.93969	0.0167553
ENSG00000102879	16	30182827	CORO1A	-2.20971	0.0167553
ENSG00000171222	20	35953617	SCAND1	-3.56879	0.0167553
ENSG00000225663	17	81822361	FAM195B	-1.85931	0.0167598
ENSG00000178623	2	240605431	GPR35	-2.07239	0.0167598
ENSG00000049656	5	1317744	CLPTM1L	-0.967923	0.0167774
ENSG00000213983	14	23559565	AP1G2	-1.1515	0.0168169
ENSG00000135596	6	109444062	MICAL1	-1.19298	0.0168169
ENSG00000160326	9	133471095	SLC2A6	-1.25703	0.0168169
ENSG00000077454	7	100574011	LRCH4	-2.3107	0.0169566
ENSG00000141002	16	89873586	TCF25	-0.863606	0.0170113
ENSG00000106400	7	101217668	ZNHIT1	-1.22471	0.0170113
ENSG00000156521	10	70137981	TYSND1	-1.4329	0.0170577
ENSG00000198276	20	63939829	UCKL1	-1.31752	0.0170833
ENSG00000186111	19	3630183	PIP5K1C	-1.55971	0.0170932
ENSG00000160691	1	154962298	SHC1	-0.89505	0.0171115
ENSG00000175416	5	176392455	CLTB	-1.41219	0.0171697
ENSG00000126882	9	131258076	FAM78A	-1.6615	0.0172042
ENSG00000125835	20	2461634	SNRPB	-1.15762	0.0172249
ENSG00000184226	13	66302834	PCDH9	1.65433	0.0174414
ENSG00000144589	2	219597860	STK11IP	-1.23854	0.0174414
ENSG00000100083	22	37608475	GGA1	-1.01639	0.0175154
ENSG00000131899	17	18225587	LLGL1	-2.18279	0.0175154
ENSG00000183617	19	3762664	MRPL54	-1.57063	0.0175513
ENSG00000127084	9	92947451	FGD3	-1.08442	0.0177988
ENSG00000135924	2	219279267	DNAJB2	-1.11912	0.0177988
ENSG00000160685	1	155002630	ZBTB7B	-1.82928	0.0177988
ENSG00000179526	8	144098633	SHARPIN	-1.684	0.0178229
ENSG00000172081	19	2071038	MOB3A	-1.17599	0.0178334
ENSG00000188986	9	137255173	NELFB	-1.81944	0.0179772
ENSG00000181444	7	149764182	ZNF467	-1.46185	0.0180435
ENSG00000124216	20	49982999	SNAI1	-1.49592	0.0182402
ENSG00000132376	17	1494571	INPP5K	-0.857701	0.0182578
ENSG00000260267	16	31456711		-1.14824	0.0182578
ENSG00000070047	11	576486	PHRF1	-1.29608	0.0183308
ENSG00000117266	1	205504595	CDK18	-2.8418	0.0183308
ENSG00000262810	17	2089681		1.22017	0.0183692
ENSG00000088538	3	50675241	DOCK3	1.82426	0.0183701
ENSG00000261231	16	47724568		1.60157	0.0183701
ENSG00000157593	6	44254096	SLC35B2	-0.929182	0.0183701
ENSG00000115568	2	218637916	ZNF142	-1.01141	0.0183701
ENSG00000123358	12	52022832	NR4A1	-1.56086	0.0183701
ENSG00000185043	15	90229975	CIB1	-0.906668	0.0183905
ENSG00000134909	11	128965060	ARHGAP32	0.642883	0.0184119
ENSG00000005075	7	102473118	POLR2J	-1.36831	0.0184119
ENSG00000062822	19	50384204	POLD1	-2.20468	0.0184119
ENSG00000124102	20	45174876	PI3	2.86662	0.0184162
ENSG00000047648	X	11137543	ARHGAP6	2.08206	0.0184162
ENSG00000140829	16	72093562	DHX38	-0.84383	0.0184162
ENSG00000073050	19	43543040	XRCC1	-1.13501	0.0184162
ENSG00000164896	7	151076593	FASTK	-1.89603	0.0184162
ENSG00000081692	1	227730425	JMJD4	-2.24078	0.0184162
ENSG00000180104	5	443158	EXOC3	-0.671337	0.0184227
ENSG00000263300	17	523140		1.53531	0.0184254
ENSG00000184640	17	77280569	42622	-1.19173	0.0184254
ENSG00000175634	11	67428460	RPS6KB2	-1.60546	0.0184254
ENSG00000166188	16	57994668	ZNF319	-1.70832	0.0184254
ENSG00000125912	19	3185563	NCLN	-1.95193	0.0184254
ENSG00000110719	11	68039016	TCIRG1	-2.02526	0.0184254
ENSG00000105669	19	18899514	COPE	-2.28521	0.0186217
ENSG00000146112	6	30676389	PPP1R18	-0.854215	0.0186936
ENSG00000138834	16	1706183	MAPK8IP3	-1.41315	0.0186936
ENSG00000103152	16	77007	MPG	-2.3342	0.0186936
ENSG00000105726	19	19645198	ATP13A1	-1.56317	0.0186974
ENSG00000103507	16	31106107	BCKDK	-1.21928	0.018776
ENSG00000170638	22	50185915	TRABD	-1.88813	0.018776
ENSG00000104872	19	49446298	PIH1D1	-1.32574	0.018832
ENSG00000100105	22	31325804	PATZ1	-0.985243	0.018843
ENSG00000111962	6	148747328	UST	0.814614	0.018858
ENSG00000083812	19	58467045	ZNF324	-1.07447	0.018858
ENSG00000125611	2	112584240	CHCHD5	-3.00032	0.018858
ENSG00000100242	22	38734725	SUN2	-1.41826	0.0190364
ENSG00000158042	11	6680782	MRPL17	-1.72258	0.0190364
ENSG00000184281	11	2400488	TSSC4	-2.06419	0.0190364
ENSG00000071655	19	1573596	MBD3	-3.35166	0.0190382
ENSG00000166446	16	80597906	CDYL2	0.643572	0.0191197
ENSG00000181817	1	36391238	LSM10	-1.3945	0.0191197
ENSG00000127824	2	219249711	TUBA4A	-0.848692	0.0191209
ENSG00000105223	19	40348456	PLD3	-1.65882	0.0191248
ENSG00000123154	19	12666800	WDR83	-2.45452	0.0191248
ENSG00000108604	17	63832081	SMARCD2	-0.90783	0.0191319
ENSG00000187764	9	89360787	SEMA4D	-0.730178	0.0192946
ENSG00000123992	2	219373546	DNPEP	-1.18013	0.0192946
ENSG00000141959	21	44300051	PFKL	-2.17411	0.0192946
ENSG00000172725	11	67435510	CORO1B	-2.33334	0.0192946
ENSG00000224051	1	1324756	CPTP	-3.4256	0.0192946
ENSG00000136877	9	127794597	FPGS	-1.1969	0.0193407
ENSG00000072818	17	7336529	ACAP1	-1.48836	0.0195363
ENSG00000099817	19	1086579	POLR2E	-1.93734	0.0195363
ENSG00000168936	4	1715952	TMEM129	-2.11446	0.0195363
ENSG00000185187	11	405716	SIGIRR	-2.11148	0.0195413
ENSG00000051128	19	18929201	HOMER3	-1.45414	0.0195559
ENSG00000148356	9	127451486	LRSAM1	-0.930524	0.0198316
ENSG00000132382	17	4538897	MYBBP1A	-1.74242	0.0198316
ENSG00000149781	11	64206678	FERMT3	-1.96516	0.0198316
ENSG00000186635	11	72685069	ARAP1	-1.0717	0.0199255
ENSG00000140988	16	1962052	RPS2	-1.26848	0.0199255
ENSG00000133597	7	140673153	ADCK2	-1.30025	0.0199255
ENSG00000067606	1	2050470	PRKCZ	-1.54363	0.0199255
ENSG00000185122	8	144291591	HSF1	-1.58931	0.0199255
ENSG00000135940	2	97646040	COX5B	-1.31743	0.0199778
ENSG00000258590	15	20657638	NBEAP1	2.92058	0.0200068
ENSG00000187051	22	39529093	RPS19BP1	-1.80082	0.0203423
ENSG00000004975	17	7225341	DVL2	-1.31086	0.0203489
ENSG00000177030	11	644233	DEAF1	-1.37644	0.0203489
ENSG00000159363	1	16985958	ATP13A2	-1.68553	0.0203489
ENSG00000114670	3	131026850	NEK11	1.37433	0.0203661
ENSG00000136279	7	44044640	DBNL	-0.986167	0.0203661
ENSG00000125454	17	75272981	SLC25A19	-1.01798	0.0203661
ENSG00000006025	17	47807372	OSBPL7	-1.44736	0.0203661
ENSG00000172732	11	65857126	MUS81	-1.53596	0.0203661
ENSG00000154102	16	85690084	C16orf74	-1.81664	0.0203661
ENSG00000030582	17	44345086	GRN	-2.03334	0.0203661
ENSG00000160058	1	32365103	BSDC1	-0.608089	0.0203963
ENSG00000136270	7	45100100	TBRG4	-1.43557	0.0203963
ENSG00000023191	11	494512	RNH1	-1.86878	0.0204524
ENSG00000160813	7	100435282	PPP1R35	-2.04971	0.0205645
ENSG00000122870	10	58513140	BICC1	2.12235	0.0205791
ENSG00000150672	11	83455012	DLG2	1.63419	0.0205791
ENSG00000183597	22	20017014	TANGO2	-1.01586	0.0205852
ENSG00000105698	19	35268978	USF2	-1.02589	0.0205852
ENSG00000103168	16	84177847	TAF1C	-1.32872	0.0205852
ENSG00000090372	19	46719507	STRN4	-1.3898	0.0205852
ENSG00000172270	19	571277	BSG	-2.02611	0.0205852
ENSG00000231210	7	116570960	LINC01510	1.8603	0.0206013
ENSG00000177628	1	155234452	GBA	-1.01522	0.0206013
ENSG00000028137	1	12167003	TNFRSF1B	-1.20068	0.0206013
ENSG00000136059	3	37988059	VILL	-1.30356	0.0206013
ENSG00000180448	19	1065923	HMHA1	-1.58365	0.0206013
ENSG00000147813	8	143574785	NAPRT	-3.27426	0.0206013
ENSG00000165175	X	38801432	MID1IP1	-1.242	0.0206321
ENSG00000233016	9	136721366	SNHG7	-1.28573	0.0206321
ENSG00000103363	16	2771414	TCEB2	-2.33849	0.0206321
ENSG00000102125	X	154411518	TAZ	-0.876736	0.0206825
ENSG00000075240	22	46576012	GRAMD4	-1.17699	0.0206825
ENSG00000103245	16	729753	NARFL	-1.93013	0.0206825
ENSG00000187796	9	136361903	CARD9	-2.352	0.0206825
ENSG00000205220	16	67934502	PSMB10	-2.65981	0.0206825
ENSG00000068903	19	38878555	SIRT2	-1.08863	0.0207369
ENSG00000142347	19	8520790	MYO1F	-1.08747	0.0207571
ENSG00000148341	9	129007036	SH3GLB2	-1.64686	0.0207571
ENSG00000237686	6	43995723		-1.70145	0.0207571
ENSG00000109339	4	86015123	MAPK10	1.97177	0.0208012
ENSG00000137221	6	43477523	TJAP1	-0.841402	0.0208048
ENSG00000114650	3	47413694	SCAP	-1.20197	0.0208048
ENSG00000099797	19	14517085	TECR	-1.38689	0.0208048
ENSG00000262919	X	153587919	FAM58A	-1.44985	0.0208048
ENSG00000125746	19	45606994	EML2	-1.67557	0.0208048
ENSG00000196576	22	50274979	PLXNB2	-1.80455	0.0208048
ENSG00000237604	21	44175489		-2.63065	0.0208048
ENSG00000125910	19	3172346	S1PR4	-2.74567	0.0208048
ENSG00000130311	19	17309518	DDA1	-1.37614	0.0213509
ENSG00000183684	17	81887844	ALYREF	-1.47224	0.0214007
ENSG00000106952	9	114893343	TNFSF8	1.43583	0.0214183
ENSG00000138107	10	102479229	ACTR1A	-0.661007	0.0214183
ENSG00000141562	17	82458180	NARF	-0.804259	0.0214183
ENSG00000105397	19	10350529	TYK2	-1.31214	0.0214183
ENSG00000101940	X	48590042	WDR13	-1.48951	0.0214183
ENSG00000113504	5	1050376	SLC12A7	-1.65651	0.0214183
ENSG00000103174	16	5024844	NAGPA	-1.77297	0.0214183
ENSG00000146859	7	135148072	TMEM140	0.987761	0.0216024
ENSG00000182162	X	1462572	P2RY8	-0.882208	0.0216024
ENSG00000197912	16	89490917	SPG7	-0.971435	0.0216024
ENSG00000204560	6	30653119	DHX16	-1.0035	0.0216024
ENSG00000261273	16	88234785		-1.41153	0.0216024
ENSG00000100297	22	35400063	MCM5	-1.42788	0.0216024
ENSG00000141522	17	81867721	ARHGDIA	-1.68926	0.0216024
ENSG00000203485	14	104689606	INF2	-1.73269	0.0216024
ENSG00000254858	19	18193182	MPV17L2	-1.96998	0.0216024
ENSG00000129925	16	370773	TMEM8A	-2.06647	0.0216024
ENSG00000075618	7	5592823	FSCN1	-3.0338	0.0216024
ENSG00000104960	19	49850735	PTOV1	-1.90105	0.021767
ENSG00000185215	14	103123442	TNFAIP2	-1.31113	0.0217712
ENSG00000132694	1	156934840	ARHGEF11	-0.81444	0.0217916
ENSG00000153443	16	4608883	UBALD1	-2.52307	0.0217916
ENSG00000158050	2	96143166	DUSP2	-1.39701	0.0218341
ENSG00000272333	19	35718019	KMT2B	-1.50504	0.0218504
ENSG00000122971	12	120725735	ACADS	-2.32255	0.0218504
ENSG00000182872	X	47144869	RBM10	-0.991846	0.021987
ENSG00000178982	19	38619082	EIF3K	-0.734592	0.022001
ENSG00000198746	1	26890488	GPATCH3	-0.990586	0.022001
ENSG00000160075	1	1541673	SSU72	-0.875439	0.0221122
ENSG00000187954	8	144449582	CYHR1	-1.7093	0.0221122
ENSG00000177169	12	131894651	ULK1	-1.71512	0.0221122
ENSG00000159840	7	143381080	ZYX	-1.77732	0.0221122
ENSG00000013364	16	29820394	MVP	-1.9658	0.0221571
ENSG00000278588	6	26272976	HIST1H2BI	-2.32463	0.0221571
ENSG00000137497	11	72002864	NUMA1	-0.940886	0.022176
ENSG00000204469	6	31620720	PRRC2A	-1.23032	0.022176
ENSG00000198171	20	3190350	DDRGK1	-1.46958	0.0221795
ENSG00000162994	2	55174791	CLHC1	1.27335	0.0223193
ENSG00000168612	20	45881227	ZSWIM1	-1.06526	0.0223193
ENSG00000099875	19	2037465	MKNK2	-1.48054	0.0223193
ENSG00000172663	11	67461710	TMEM134	-1.95045	0.0223193
ENSG00000110108	11	60913874	TMEM109	-1.01422	0.0224432
ENSG00000187556	19	13862063	NANOS3	-1.48303	0.0224432
ENSG00000161016	8	144789765	RPL8	-1.5291	0.0224432
ENSG00000204371	6	31879759	EHMT2	-1.66399	0.0224432
ENSG00000136718	2	130342225	IMP4	-0.978195	0.0225775
ENSG00000166428	14	104924816	PLD4	-1.99381	0.0225788
ENSG00000258227	7	141927357	CLEC5A	1.30154	0.0226043
ENSG00000185477	4	89236386	GPRIN3	0.949576	0.0226043
ENSG00000105700	19	18557762	KXD1	-0.820247	0.0226043
ENSG00000049239	1	9234775	H6PD	-0.829418	0.0226043
ENSG00000068120	17	42561467	COASY	-1.61238	0.0226043
ENSG00000122678	7	44072247	POLM	-1.12198	0.0226327
ENSG00000167977	16	2682475	KCTD5	-1.28447	0.0226327
ENSG00000160883	5	176880869	HK3	-1.73906	0.0226327
ENSG00000105402	19	47487637	NAPA	-0.953528	0.0226616
ENSG00000167671	19	4444999	UBXN6	-1.31141	0.0226616
ENSG00000113657	5	147390811	DPYSL3	1.0969	0.0227296
ENSG00000115339	2	165747591	GALNT3	0.759397	0.0227853
ENSG00000060069	18	79679801	CTDP1	-0.759851	0.0227992
ENSG00000105401	19	10391134	CDC37	-1.06998	0.022802
ENSG00000126088	1	45012147	UROD	-1.10787	0.022802
ENSG00000100401	22	41245611	RANGAP1	-1.21789	0.022802
ENSG00000115896	2	197804702	PLCL1	1.25291	0.0228102
ENSG00000197226	5	179862066	TBC1D9B	-1.06541	0.0228102
ENSG00000167280	17	79074939	ENGASE	-1.87692	0.022958
ENSG00000071889	X	154506159	FAM3A	-2.50765	0.022958
ENSG00000133884	11	65333754	DPF2	-1.09246	0.0230261
ENSG00000105221	19	40230317	AKT2	-1.26452	0.0230261
ENSG00000249072	4	78008512		-9.40611	0.0233216
ENSG00000175183	12	76858715	CSRP2	1.63419	0.0233574
ENSG00000100325	22	29788608	ASCC2	-0.703706	0.0233574
ENSG00000165282	9	35088688	PIGO	-1.00942	0.0233574
ENSG00000161013	5	179797597	MGAT4B	-1.08114	0.0233574
ENSG00000213676	6	32098176	ATF6B	-1.17267	0.0233574
ENSG00000126432	11	64318088	PRDX5	-1.23809	0.0233574
ENSG00000170889	19	54200742	RPS9	-1.43295	0.0233574
ENSG00000169100	X	1386152	SLC25A6	-1.45462	0.0233574
ENSG00000131462	17	42609676	TUBG1	-1.5658	0.0233574
ENSG00000108262	17	29573469	GIT1	-1.58345	0.0233574
ENSG00000166925	7	100463359	TSC22D4	-1.68471	0.0233574
ENSG00000007520	16	1349240	TSR3	-2.66003	0.0233574
ENSG00000166816	16	75111860	LDHD	-3.22907	0.0233574
ENSG00000140853	16	56989485	NLRC5	-0.874407	0.023378
ENSG00000105677	19	35545595	TMEM147	-0.945246	0.023378
ENSG00000092098	14	24146683	RNF31	-1.29607	0.023378
ENSG00000158717	16	88696495	RNF166	-1.51042	0.023378
ENSG00000262655	11	13962689	SPON1	2.15931	0.0234422
ENSG00000196700	20	63956702	ZNF512B	-1.99021	0.0234422
ENSG00000168393	2	241675742	DTYMK	-2.24685	0.0234422
ENSG00000281593	7	30362400		0.669837	0.0234768
ENSG00000127663	19	4969113	KDM4B	-1.04539	0.0234768
ENSG00000160888	19	13150415	IER2	-1.07584	0.0234768
ENSG00000148832	10	133379234	PAOX	-1.31349	0.0234768
ENSG00000105063	19	55229780	PPP6R1	-1.3585	0.0234768
ENSG00000164889	7	151057210	SLC4A2	-1.87305	0.0234768
ENSG00000178726	20	23045633	THBD	1.5318	0.0234928
ENSG00000089154	12	120127203	GCN1L1	-0.726869	0.0234928
ENSG00000258404	14	101634454		1.66721	0.023582
ENSG00000145390	4	119212587	USP53	1.10682	0.023582
ENSG00000125755	19	45815410	SYMPK	-0.923995	0.023582
ENSG00000069399	19	44747705	BCL3	-0.965441	0.023582
ENSG00000117408	1	43946939	IPO13	-1.28186	0.023582
ENSG00000198055	5	177403204	GRK6	-1.38915	0.023582
ENSG00000233927	19	8321158	RPS28	-2.19727	0.023582
ENSG00000164897	7	151081080	TMUB1	-2.7237	0.023582
ENSG00000134532	12	23529500	SOX5	2.02247	0.0236723
ENSG00000108961	17	8288497	RANGRF	-1.17832	0.0236723
ENSG00000174943	16	29905012	KCTD13	-1.31499	0.0236723
ENSG00000170190	17	75087727	SLC16A5	-1.35069	0.0236723
ENSG00000133958	14	93333219	UNC79	1.03578	0.0237388
ENSG00000106397	7	101205977	PLOD3	-1.50598	0.0237388
ENSG00000163517	3	13479724	HDAC11	-1.57661	0.0237388
ENSG00000073060	12	124776856	SCARB1	-1.02746	0.0238423
ENSG00000118046	19	1177558	STK11	-1.52737	0.0238423
ENSG00000100889	14	24094053	PCK2	-1.30714	0.0239268
ENSG00000167112	9	128305161	TRUB2	-1.67337	0.0239594
ENSG00000162882	2	42767089	HAAO	-1.69459	0.0239594
ENSG00000082014	7	151238764	SMARCD3	-1.03002	0.0239829
ENSG00000158828	1	20633455	PINK1	-1.0016	0.0240061
ENSG00000104870	19	49506816	FCGRT	-1.28258	0.0240061
ENSG00000124659	6	42744481	TBCC	-1.36661	0.0240061
ENSG00000145494	5	1801400	NDUFS6	-0.958432	0.0240224
ENSG00000105372	19	41859918	RPS19	-1.32639	0.0241038
ENSG00000008382	19	4343527	MPND	-1.81774	0.0241955
ENSG00000023892	6	35297852	DEF6	-0.941521	0.0242616
ENSG00000106683	7	74082933	LIMK1	-1.36399	0.0242616
ENSG00000162591	1	3489920	MEGF6	-2.16117	0.0242861
ENSG00000130881	19	33177603	LRP3	-2.47042	0.0242861
ENSG00000188976	1	944204	NOC2L	-1.38918	0.0244069
ENSG00000183773	22	20965108	AIFM3	-2.27928	0.0244069
ENSG00000164062	3	49674002	APEH	-1.25462	0.0244301
ENSG00000111737	12	120095095	RAB35	-0.930655	0.0244995
ENSG00000020129	1	35557473	NCDN	-2.23202	0.0246699
ENSG00000159692	4	1211448	CTBP1	-1.2555	0.0247511
ENSG00000103111	16	77190835	MON1B	-0.825282	0.0248597
ENSG00000198356	19	12737139	ASNA1	-1.29444	0.0248597
ENSG00000204536	6	31142439	CCHCR1	-1.53719	0.0248597
ENSG00000143801	1	226870184	PSEN2	-0.938693	0.0249392
ENSG00000160209	21	43719094	PDXK	-0.966577	0.0249392
ENSG00000197948	5	141639302	FCHSD1	-0.975571	0.0249392
ENSG00000111321	12	6375045	LTBR	-1.50838	0.0249392
ENSG00000268849	19	51211080	SIGLEC22P	-1.89685	0.0249392
ENSG00000160255	21	44885953	ITGB2	-1.28666	0.0249618
ENSG00000149150	11	57484534	SLC43A1	-1.27944	0.0250163
ENSG00000133216	1	22710839	EPHB2	-1.51615	0.0250678
ENSG00000105229	19	4007646	PIAS4	-1.47537	0.0251143
ENSG00000198853	9	35490127	RUSC2	-1.03246	0.0253548
ENSG00000197355	9	137077501	UAP1L1	-1.24671	0.025385
ENSG00000021762	11	3087116	OSBPL5	-1.44657	0.025385
ENSG00000125089	4	8182072	SH3TC1	-1.50962	0.025385
ENSG00000197150	7	151028422	ABCB8	-1.92823	0.0254734
ENSG00000180061	19	55312801	TMEM150B	-1.18196	0.0255159
ENSG00000232973	2	38073447	CYP1B1-AS1	0.990536	0.0255797
ENSG00000131143	16	85798633	COX4I1	-0.708807	0.0255797
ENSG00000162298	11	65121780	SYVN1	-0.905739	0.0255797
ENSG00000274618	6	26240426	HIST1H4F	-1.92123	0.0255797
ENSG00000180879	X	153793516	SSR4	-1.30416	0.0256949
ENSG00000105227	19	40393768	PRX	-1.72568	0.0256949
ENSG00000159339	1	17308195	PADI4	-1.80409	0.0256949
ENSG00000135722	16	67159931	FBXL8	-2.09692	0.0257107
ENSG00000116337	1	109616104	AMPD2	-1.47922	0.0257564
ENSG00000165178	7	75156639	NCF1C	-1.62324	0.0257564
ENSG00000175756	1	1373730	AURKAIP1	-2.05346	0.0257564
ENSG00000136643	1	213051233	RPS6KC1	0.798303	0.0258282
ENSG00000140326	15	42723559	CDAN1	-1.10654	0.0258282
ENSG00000100060	22	37469063	MFNG	-1.27895	0.0258282
ENSG00000162073	16	2969245	PAQR4	-1.68552	0.0258282
ENSG00000258183	12	90280894		1.95754	0.0259236
ENSG00000204348	6	31969810	DXO	-1.25085	0.0259236
ENSG00000010295	12	6538375	IFFO1	-1.3057	0.0259236
ENSG00000100243	22	42617840	CYB5R3	-1.17445	0.0259877
ENSG00000141258	17	2337498	SGSM2	-1.2483	0.026127
ENSG00000106565	7	150791285	TMEM176B	-4.09013	0.026127
ENSG00000168591	17	44186970	TMUB2	-0.872816	0.02615
ENSG00000060491	20	62804835	OGFR	-1.56823	0.0262272
ENSG00000205643	22	46244011	CDPF1	-2.21794	0.0262272
ENSG00000163689	3	58717365	C3orf67	1.94144	0.0263233
ENSG00000103415	16	4474690	HMOX2	-0.855018	0.0263233
ENSG00000132128	1	46261196	LRRC41	-0.85973	0.0263233
ENSG00000142669	1	26279176	SH3BGRL3	-1.137	0.0263233
ENSG00000142039	19	41310189	CCDC97	-1.17796	0.0263233
ENSG00000158863	8	22089159	FAM160B2	-1.51546	0.0263233
ENSG00000259717	14	103120847	LINC00677	-1.64406	0.0263233
ENSG00000130313	19	17511629	PGLS	-1.65432	0.0263233
ENSG00000086504	16	367384	MRPL28	-1.90869	0.0263233
ENSG00000130731	16	634427	C16orf13	-2.09459	0.0263233
ENSG00000229809	16	30569346	ZNF688	-2.39499	0.0263625
ENSG00000139289	12	76025447	PHLDA1	1.57014	0.026382
ENSG00000144451	2	213284379	SPAG16	1.44968	0.026382
ENSG00000197530	1	1615415	MIB2	-1.96239	0.026382
ENSG00000235385	X	13266048		1.24812	0.0263852
ENSG00000072110	14	68874143	ACTN1	-0.815327	0.0263852
ENSG00000175489	19	18391144	LRRC25	-1.57483	0.0263852
ENSG00000276966	6	26204645	HIST1H4E	-1.59562	0.0263852
ENSG00000176978	9	137110542	DPP7	-2.62708	0.0263852
ENSG00000279719	15	79989905		0.917654	0.0264685
ENSG00000176101	9	137188647	SSNA1	-1.97798	0.0264685
ENSG00000074370	17	3923870	ATP2A3	-1.11926	0.0265163
ENSG00000130489	22	50523568	SCO2	-2.31942	0.0266347
ENSG00000168924	4	1811479	LETM1	-1.13229	0.0267044
ENSG00000079432	19	42268537	CIC	-1.66618	0.0267044
ENSG00000183060	15	99715697	LYSMD4	-1.07553	0.0267934
ENSG00000185345	6	161347420	PARK2	1.07969	0.0268035
ENSG00000102882	16	30114105	MAPK3	-1.06536	0.0269838
ENSG00000166145	15	40844018	SPINT1	-1.43894	0.0270092
ENSG00000105618	19	54115410	PRPF31	-1.09282	0.0270241
ENSG00000100075	22	19175575	SLC25A1	-1.47562	0.0270241
ENSG00000203993	9	137615332	ARRDC1-AS1	-2.18268	0.0270959
ENSG00000107130	9	130172578	NCS1	-3.3638	0.0270959
ENSG00000175376	11	65996545	EIF1AD	-0.776678	0.0271811
ENSG00000100324	22	39399741	TAB1	-1.30786	0.0272309
ENSG00000160410	19	40576851	SHKBP1	-1.37893	0.0272309
ENSG00000105197	19	39480412	TIMM50	-1.09609	0.0273081
ENSG00000172831	16	66934444	CES2	-1.18979	0.0273315
ENSG00000150990	12	124946825	DHX37	-1.365	0.0273315
ENSG00000042493	2	85394748	CAPG	-1.46828	0.0273525
ENSG00000173327	11	65597755	MAP3K11	-1.75525	0.0273728
ENSG00000250510	12	6821545	GPR162	-2.07536	0.0274114
ENSG00000137818	15	69452784	RPLP1	-1.57836	0.0275151
ENSG00000177697	11	832843	CD151	-1.68607	0.0275698
ENSG00000101220	20	3753508	C20orf27	-2.22309	0.0275742
ENSG00000175467	11	65961689	SART1	-1.58656	0.0276565
ENSG00000105325	19	3506273	FZR1	-1.76714	0.0276565
ENSG00000108107	19	55385345	RPL28	-1.49892	0.0277177
ENSG00000169733	17	82047902	RFNG	-2.38338	0.0277177
ENSG00000072958	19	16197578	AP1M1	-1.26242	0.027754
ENSG00000167770	11	63985853	OTUB1	-1.02277	0.0278371
ENSG00000125458	17	75130225	NT5C	-1.5259	0.0279175
ENSG00000105374	19	51371606	NKG7	-1.56717	0.0279874
ENSG00000157881	1	2508533	PANK4	-1.13996	0.0281777
ENSG00000133275	19	1941149	CSNK1G2	-1.72328	0.0282382
ENSG00000134152	15	34140674	KATNBL1	0.82901	0.028286
ENSG00000168298	6	26156391	HIST1H1E	-2.5949	0.028286
ENSG00000179869	7	48171458	ABCA13	1.17731	0.0283947
ENSG00000104518	8	143553207	GSDMD	-2.15684	0.0284149
ENSG00000185813	17	81900965	PCYT2	-1.5046	0.0284199
ENSG00000130396	6	167826922	MLLT4	1.50684	0.0286648
ENSG00000136830	9	127505339	FAM129B	-1.24925	0.0286648
ENSG00000141574	17	82321024	SECTM1	-1.79431	0.0286648
ENSG00000007255	19	45162928	TRAPPC6A	-1.8229	0.0286648
ENSG00000105732	19	42068477	ZNF574	-2.98974	0.0286648
ENSG00000103024	16	1770286	NME3	-3.59357	0.028878
ENSG00000132017	19	13952492	DCAF15	-1.43561	0.0289037
ENSG00000149823	11	65089324	VPS51	-1.38763	0.0289991
ENSG00000146192	6	37005646	FGD2	-1.37184	0.0291762
ENSG00000171723	14	66507407	GPHN	0.768859	0.0291921
ENSG00000186577	6	34246380	C6orf1	-1.39513	0.0293248
ENSG00000215021	12	6965327	PHB2	-0.686534	0.0294536
ENSG00000128309	22	37019635	MPST	-1.79382	0.0295178
ENSG00000038358	16	67873023	EDC4	-1.06678	0.0295216
ENSG00000126456	19	49659569	IRF3	-1.37278	0.0295216
ENSG00000039650	19	49861204	PNKP	-1.21635	0.0295643
ENSG00000268895	19	58347751	A1BG-AS1	-1.6583	0.0295643
ENSG00000167792	11	67606852	NDUFV1	-1.56733	0.0296469
ENSG00000126934	19	4090321	MAP2K2	-1.55068	0.02974
ENSG00000174996	11	66257294	KLC2	-1.9342	0.02974
ENSG00000169220	5	177357837	RGS14	-2.44	0.0297823
ENSG00000160932	8	143017982	LY6E	-2.27336	0.0298644
ENSG00000231304	3	20342468		1.20661	0.0300152
ENSG00000250479	22	23765834	CHCHD10	-1.476	0.0300792
ENSG00000164023	4	107824563	SGMS2	0.867942	0.0301488
ENSG00000063245	19	55675226	EPN1	-1.3305	0.0302116
ENSG00000104973	19	49818279	MED25	-1.48907	0.0302116
ENSG00000175294	11	66016752	CATSPER1	-1.10456	0.0302878
ENSG00000076928	19	41883161	ARHGEF1	-1.87492	0.0302878
ENSG00000198712	MT	7586	MT-CO2	0.712325	0.0303066
ENSG00000088247	19	6413348	KHSRP	-0.99281	0.0303066
ENSG00000173540	3	49716844	GMPPB	-1.55462	0.0303066
ENSG00000100605	14	92936914	ITPK1	-0.990235	0.0303772
ENSG00000091640	17	4959226	SPAG7	-0.94184	0.0304351
ENSG00000168872	16	70299224	DDX19A	-1.25659	0.0304351
ENSG00000025708	22	50525752	TYMP	-1.75883	0.0304351
ENSG00000149657	20	62122461	LSM14B	-0.952743	0.0304644
ENSG00000162244	3	51993600	RPL29	-0.881743	0.030532
ENSG00000248508	15	40039311	SRP14-AS1	-1.06105	0.030532
ENSG00000260708	22	46761894		-1.45469	0.030532
ENSG00000139915	14	46839629	MDGA2	2.03454	0.0305505
ENSG00000134028	8	24384285	ADAMDEC1	1.00186	0.030571
ENSG00000250182	5	14651941	EEF1A1P13	0.770115	0.030571
ENSG00000054967	11	73376264	RELT	-0.903498	0.030571
ENSG00000236990	10	4051726		1.16414	0.0306183
ENSG00000214212	19	10836575	C19orf38	-1.16826	0.03074
ENSG00000036257	2	224470150	CUL3	0.711855	0.030851
ENSG00000163945	4	1347266	UVSSA	-0.790972	0.030851
ENSG00000130479	19	17719242	MAP1S	-1.456	0.030851
ENSG00000104823	19	38815422	ECH1	-1.92705	0.030851
ENSG00000172922	11	65714896	RNASEH2C	-1.38451	0.0309238
ENSG00000167658	19	3976056	EEF2	-1.42736	0.0309238
ENSG00000133243	19	1985438	BTBD2	-2.28484	0.0309238
ENSG00000100319	22	29730956	ZMAT5	-1.58154	0.0309488
ENSG00000196961	19	49766968	AP2A1	-1.1249	0.0310809
ENSG00000129667	17	76470891	RHBDF2	-1.14507	0.0310942
ENSG00000142102	11	289135	ATHL1	-1.96417	0.0311532
ENSG00000185201	11	307631	IFITM2	-1.20981	0.0312296
ENSG00000198363	8	61500556	ASPH	0.944886	0.031329
ENSG00000254554	11	10302657		-1.48413	0.031411
ENSG00000172932	11	67288547	ANKRD13D	-1.43138	0.03179
ENSG00000143774	1	228139962	GUK1	-1.61491	0.03179
ENSG00000149499	11	62602218	EML3	-0.84198	0.0318561
ENSG00000070404	19	676365	FSTL3	-2.19233	0.0320425
ENSG00000175727	12	122078722	MLXIP	-0.853088	0.0323299
ENSG00000174903	11	66268533	RAB1B	-1.04498	0.0323299
ENSG00000102312	X	48508962	PORCN	-1.25596	0.0323299
ENSG00000247077	12	132710819	PGAM5	-1.47224	0.0323299
ENSG00000177105	11	3826978	RHOG	-0.736633	0.0323381
ENSG00000140365	15	75335891	COMMD4	-1.72617	0.0323381
ENSG00000221883	3	48917788	ARIH2OS	-1.93036	0.0324466
ENSG00000110442	11	36269284	COMMD9	-0.601993	0.0324467
ENSG00000129595	5	112142441	EPB41L4A	1.28776	0.0324598
ENSG00000166794	15	64155812	PPIB	-0.823207	0.0324598
ENSG00000130560	9	135932969	UBAC1	-1.1001	0.0324598
ENSG00000196923	5	177483394	PDLIM7	-1.17619	0.0324598
ENSG00000172375	11	119102198	C2CD2L	-1.24626	0.0324598
ENSG00000041880	3	51942345	PARP3	-1.3687	0.0324598
ENSG00000173992	11	66592821	CCS	-1.78052	0.0324598
ENSG00000093010	22	19941607	COMT	-1.89589	0.0324598
ENSG00000119383	9	129110950	PPP2R4	-0.967803	0.0325003
ENSG00000012061	19	45407333	ERCC1	-0.969655	0.0325003
ENSG00000181523	17	80206716	SGSH	-1.3445	0.0325003
ENSG00000128340	22	37225261	RAC2	-0.890504	0.0325432
ENSG00000126602	16	3651639	TRAP1	-1.00379	0.0325432
ENSG00000197858	8	144082590	GPAA1	-2.27506	0.0325432
ENSG00000234616	8	142657460	JRK	-1.36389	0.0328513
ENSG00000089157	12	120196686	RPLP0	-0.730863	0.0328828
ENSG00000114383	3	50320027	TUSC2	-1.00769	0.0328828
ENSG00000070423	19	647526	RNF126	-2.00924	0.0328828
ENSG00000104964	19	3052910	AES	-1.20425	0.0331405
ENSG00000198517	7	1530714	MAFK	-1.56374	0.0331414
ENSG00000201428	12	112267077	RN7SKP71	-1.00833	0.033444
ENSG00000095906	16	1782901	NUBP2	-2.81759	0.0334856
ENSG00000077238	16	27313668	IL4R	-0.903915	0.0336473
ENSG00000138964	22	44172956	PARVG	-1.12962	0.0336473
ENSG00000051523	16	88643283	CYBA	-1.29477	0.0336473
ENSG00000280739	3	40173145	EIF1B-AS1	1.2769	0.0337328
ENSG00000115307	2	74526645	AUP1	-0.712438	0.0337392
ENSG00000091073	7	76461676	DTX2	-1.22309	0.0337392
ENSG00000148803	10	133355154	FUOM	-2.27382	0.0337392
ENSG00000089060	12	113298759	SLC8B1	-0.659567	0.0337771
ENSG00000063177	19	48615328	RPL18	-0.930382	0.0337771
ENSG00000124126	20	48624252	PREX1	-0.77247	0.033788
ENSG00000079462	19	42297033	PAFAH1B3	-1.78866	0.033788
ENSG00000108622	17	64002594	ICAM2	-1.27939	0.0339159
ENSG00000107521	10	98416198	HPS1	-0.699848	0.0339403
ENSG00000179262	19	12945855	RAD23A	-1.17308	0.0339496
ENSG00000130304	19	17468769	SLC27A1	-1.30888	0.0340126
ENSG00000142546	19	49555711	NOSIP	-1.50974	0.0340126
ENSG00000143126	1	109250019	CELSR2	-1.8432	0.0340126
ENSG00000184897	3	129314771	H1FX	-2.52181	0.0340284
ENSG00000166595	16	66932055	FAM96B	-1.13248	0.0341189
ENSG00000032444	19	7534004	PNPLA6	-1.39232	0.0341189
ENSG00000263050	17	2043475		0.997014	0.0341373
ENSG00000171953	17	17977409	ATPAF2	-0.781179	0.0341744
ENSG00000125651	19	6379569	GTF2F1	-0.805895	0.03418
ENSG00000187630	14	23969874	DHRS4L2	-0.91606	0.03418
ENSG00000104859	19	45039040	CLASRP	-1.03005	0.03418
ENSG00000065000	19	2100988	AP3D1	-1.05439	0.03418
ENSG00000130204	19	44890569	TOMM40	-1.72616	0.03418
ENSG00000236383	17	43216941	LINC00854	-1.74311	0.03418
ENSG00000176476	16	28553915	CCDC101	-1.36317	0.0342064
ENSG00000186174	11	118893875	BCL9L	-1.45187	0.0342064
ENSG00000133048	1	203178931	CHI3L1	2.54117	0.0344678
ENSG00000130985	X	47190861	UBA1	-0.749497	0.034559
ENSG00000008130	1	1751232	NADK	-1.03302	0.034559
ENSG00000140386	15	76347904	SCAPER	0.539142	0.0346139
ENSG00000083444	1	11934205	PLOD1	-1.07517	0.0346139
ENSG00000118162	19	47475144	KPTN	-1.52616	0.0346139
ENSG00000278637	6	26021679	HIST1H4A	-2.29221	0.0347271
ENSG00000176170	17	76376584	SPHK1	-1.82265	0.0347796
ENSG00000105281	19	46774883	SLC1A5	-1.22097	0.0348296
ENSG00000171159	9	128160260	C9orf16	-2.64945	0.0348736
ENSG00000137100	9	34613545	DCTN3	-0.930652	0.0350963
ENSG00000139192	12	6451690	TAPBPL	-1.40983	0.0350963
ENSG00000061273	12	47782722	HDAC7	-1.49229	0.0350963
ENSG00000279369	17	63700847		-1.5702	0.0350963
ENSG00000104886	19	2230084	PLEKHJ1	-1.93058	0.0350963
ENSG00000140995	16	89947925	DEF8	-1.09289	0.035157
ENSG00000125740	19	45467995	FOSB	-1.10965	0.035157
ENSG00000159674	4	1166932	SPON2	-1.44147	0.035157
ENSG00000114735	3	50569152	HEMK1	-1.44797	0.035157
ENSG00000123143	19	14433053	PKN1	-1.47337	0.035157
ENSG00000131669	9	93121489	NINJ1	-1.56053	0.035157
ENSG00000198933	17	47694081	TBKBP1	-2.54063	0.035157
ENSG00000116871	1	36155579	MAP7D1	-0.889239	0.0352864
ENSG00000148660	10	73812501	CAMK2G	-0.687921	0.0353438
ENSG00000089693	12	6747996	MLF2	-0.832133	0.0353572
ENSG00000179364	14	105300563	PACS2	-1.49053	0.0353572
ENSG00000250349	X	37349330		0.649592	0.0354064
ENSG00000103653	15	74782057	CSK	-1.70599	0.0354434
ENSG00000119688	14	74285423	ABCD4	-0.988096	0.0354627
ENSG00000178075	3	113828182	GRAMD1C	1.60653	0.0355313
ENSG00000176248	9	137174784	ANAPC2	-1.16571	0.0355313
ENSG00000100577	14	77320884	GSTZ1	-1.26317	0.0355313
ENSG00000170458	5	140631728	CD14	-1.86811	0.0356562
ENSG00000177225	11	767220	PDDC1	-1.73051	0.0359269
ENSG00000247596	3	52228610	TWF2	-1.8195	0.0359269
ENSG00000228300	19	1275438	C19orf24	-2.3908	0.0359269
ENSG00000114626	3	127672935	ABTB1	-1.29277	0.0359397
ENSG00000120942	1	11273206	UBIAD1	-0.921159	0.0360206
ENSG00000100151	22	38056311	PICK1	-1.3844	0.0360447
ENSG00000074842	19	4641374	MYDGF	-0.930809	0.0360953
ENSG00000125352	X	119870475	RNF113A	-0.952544	0.0360953
ENSG00000170396	2	184598366	ZNF804A	0.725193	0.0361131
ENSG00000167797	11	67506497	CDK2AP2	-1.87849	0.0361934
ENSG00000128159	22	50217689	TUBGCP6	-1.46901	0.0363094
ENSG00000166169	10	101578882	POLL	-1.14541	0.0364209
ENSG00000115694	2	241492674	STK25	-1.19385	0.0364209
ENSG00000110011	11	64230278	DNAJC4	-1.39279	0.0364209
ENSG00000167705	17	1646145	RILP	-1.43785	0.0364209
ENSG00000185324	16	89680737	CDK10	-1.5006	0.0364209
ENSG00000123933	4	2247432	MXD4	-1.70831	0.0364209
ENSG00000099821	19	617224	POLRMT	-1.98496	0.0364394
ENSG00000165030	9	91409045	NFIL3	0.869671	0.0364844
ENSG00000126883	9	131125561	NUP214	-0.51194	0.0364844
ENSG00000087152	17	44191805	ATXN7L3	-0.926913	0.0364844
ENSG00000104142	15	40894430	VPS18	-0.9509	0.0364844
ENSG00000170037	17	7932101	CNTROB	-0.976716	0.0364844
ENSG00000185504	17	81539885	FAAP100	-2.22816	0.0364844
ENSG00000127580	16	684622	WDR24	-2.64909	0.0364844
ENSG00000132535	17	7189890	DLG4	-1.12624	0.0366438
ENSG00000177663	22	17084954	IL17RA	-0.924222	0.0366565
ENSG00000130159	19	11505916	ECSIT	-1.13069	0.0367685
ENSG00000167468	19	1103926	GPX4	-1.17742	0.0367685
ENSG00000140379	15	79960889	BCL2A1	0.695635	0.0368243
ENSG00000185019	20	3107573	UBOX5	-1.03305	0.0368243
ENSG00000160360	9	136327476	GPSM1	-3.14953	0.0368243
ENSG00000146826	7	100154420	C7orf43	-1.50454	0.036836
ENSG00000189077	7	75986837	TMEM120A	-1.25092	0.0369186
ENSG00000100300	22	43151514	TSPO	-2.13871	0.0369552
ENSG00000179915	2	49918505	NRXN1	2.52668	0.0371605
ENSG00000143093	1	110031577	STRIP1	-0.673085	0.0371605
ENSG00000129521	14	33924231	EGLN3	1.67134	0.0371778
ENSG00000182544	12	53251251	MFSD5	-1.04496	0.0371778
ENSG00000126457	19	49675786	PRMT1	-1.31727	0.0371778
ENSG00000133027	17	17505563	PEMT	-1.8004	0.0371778
ENSG00000278705	6	26026815	HIST1H4B	-2.07352	0.0371778
ENSG00000157954	7	5190188	WIPI2	-0.712067	0.0374064
ENSG00000140990	16	1959508	NDUFB10	-0.914948	0.0374064
ENSG00000177951	11	167784	BET1L	-0.931659	0.0374064
ENSG00000131408	19	50329653	NR1H2	-1.54988	0.0374064
ENSG00000188522	17	18968789	FAM83G	-1.78038	0.0374064
ENSG00000187741	16	89737549	FANCA	-1.20899	0.0375522
ENSG00000213923	22	38290691	CSNK1E	-1.04371	0.0375788
ENSG00000125503	19	55090913	PPP1R12C	-1.3011	0.0375788
ENSG00000115286	19	1383527	NDUFS7	-2.25954	0.0375788
ENSG00000176087	5	140564456	SLC35A4	-0.872025	0.0378111
ENSG00000160445	9	128729786	ZER1	-1.23199	0.0378111
ENSG00000180900	8	143790920	SCRIB	-2.00375	0.0378111
ENSG00000237461	9	99585786		0.854433	0.0378844
ENSG00000179921	2	218259496	GPBAR1	-2.53279	0.0378844
ENSG00000152315	14	90061765	KCNK13	0.830838	0.0380091
ENSG00000167778	12	53064316	SPRYD3	-1.21906	0.0380091
ENSG00000160703	11	119166568	NLRX1	-1.78738	0.0380091
ENSG00000013306	17	44319625	SLC25A39	-1.90548	0.0380817
ENSG00000244038	1	20651767	DDOST	-0.77368	0.0381085
ENSG00000142405	19	53793603	NLRP12	-1.20204	0.0381085
ENSG00000169592	16	29995294	INO80E	-1.43235	0.0381085
ENSG00000184730	16	28494649	APOBR	-1.81623	0.0381085
ENSG00000104976	19	7920316	SNAPC2	-2.25658	0.0381085
ENSG00000141994	19	5784832	DUS3L	-2.31224	0.0381085
ENSG00000143537	1	155050566	ADAM15	-1.36963	0.0383289
ENSG00000137841	15	40278176	PLCB2	-0.816818	0.0385674
ENSG00000149930	16	29973641	TAOK2	-0.999816	0.0385674
ENSG00000159377	1	151399534	PSMB4	-0.598235	0.0386097
ENSG00000204839	8	143566187	MROH6	-2.56075	0.0386097
ENSG00000137877	15	41848144	SPTBN5	-1.74892	0.0386149
ENSG00000071894	8	144393229	CPSF1	-2.12909	0.038669
ENSG00000112667	6	43225629	DNPH1	-1.57082	0.038682
ENSG00000178802	15	74890005	MPI	-0.985	0.0387644
ENSG00000177731	17	18244836	FLII	-1.01841	0.0388423
ENSG00000090565	16	425619	RAB11FIP3	-1.15173	0.0389264
ENSG00000267503	18	13561399		0.940929	0.0390285
ENSG00000103145	16	3022620	HCFC1R1	-1.57714	0.0390867
ENSG00000149806	11	65120628	FAU	-1.05882	0.0391113
ENSG00000109670	4	152321259	FBXW7	0.630999	0.0391861
ENSG00000099949	22	20979462	LZTR1	-1.71853	0.0391861
ENSG00000205356	7	98214624	TECPR1	-1.97395	0.0391944
ENSG00000149932	16	29940885	TMEM219	-0.975011	0.0392206
ENSG00000087087	7	100875111	SRRT	-0.993645	0.0392833
ENSG00000263264	19	7348943		-1.22792	0.0392833
ENSG00000266714	17	75588058	MYO15B	-1.41099	0.0393058
ENSG00000105364	19	10251901	MRPL4	-2.02003	0.0393058
ENSG00000100365	22	36860988	NCF4	-1.28051	0.0393381
ENSG00000132510	17	7839904	KDM6B	-0.932542	0.0393991
ENSG00000237233	10	61452639	TMEM26-AS1	0.941137	0.0394785
ENSG00000185359	17	81683326	HGS	-0.900587	0.0398567
ENSG00000197586	20	25195693	ENTPD6	-1.1076	0.0398567
ENSG00000115107	2	119223831	STEAP3	-0.981607	0.039866
ENSG00000048140	5	176647387	TSPAN17	-1.14801	0.039866
ENSG00000196284	6	44809317	SUPT3H	0.88826	0.0399353
ENSG00000110446	11	60937083	SLC15A3	-0.770331	0.0401471
ENSG00000124574	6	43427366	ABCC10	-1.25027	0.0401471
ENSG00000150627	4	176065834	WDR17	0.915271	0.0401823
ENSG00000113391	5	93618069	FAM172A	0.588576	0.0402614
ENSG00000154222	1	52345723	CC2D1B	-0.725899	0.0402628
ENSG00000006831	12	1688574	ADIPOR2	0.650998	0.0404397
ENSG00000123395	12	52069246	ATG101	-1.15838	0.0406323
ENSG00000258561	14	66212810		1.6269	0.0406625
ENSG00000169181	16	27787535	GSG1L	2.46376	0.0407633
ENSG00000116521	1	155255979	SCAMP3	-1.23958	0.0407801
ENSG00000090447	16	4257186	TFAP4	-1.80258	0.0407801
ENSG00000075790	7	107579977	BCAP29	0.519763	0.0409397
ENSG00000100629	14	80476983	CEP128	0.690905	0.0409675
ENSG00000181722	3	114338094	ZBTB20	0.611048	0.0410348
ENSG00000132635	20	2835314	PCED1A	-1.38433	0.0410439
ENSG00000180539	9	137027464	C9orf139	-2.67015	0.0410439
ENSG00000079313	19	1815246	REXO1	-1.22078	0.0410968
ENSG00000136878	9	129834698	USP20	-1.05776	0.041236
ENSG00000090432	1	20499448	MUL1	-0.937604	0.041385
ENSG00000100258	22	50502949	LMF2	-2.36476	0.0413877
ENSG00000008710	16	2088710	PKD1	-1.91502	0.0413917
ENSG00000129911	19	1852399	KLF16	-1.77434	0.0414132
ENSG00000089123	20	13389392	TASP1	0.701595	0.041417
ENSG00000196365	19	5691834	LONP1	-1.07296	0.0416324
ENSG00000136802	9	128882112	LRRC8A	-1.08434	0.0416324
ENSG00000089820	X	153907367	ARHGAP4	-1.31291	0.0416856
ENSG00000063854	16	1795620	HAGH	-1.33539	0.0416856
ENSG00000175463	11	67403915	TBC1D10C	-1.57937	0.0416856
ENSG00000103148	16	84271	NPRL3	-1.97825	0.0417323
ENSG00000085265	9	134905890	FCN1	-1.08068	0.0417698
ENSG00000176406	8	103500748	RIMS2	2.56692	0.0417843
ENSG00000134215	1	107571160	VAV3	0.60563	0.0417843
ENSG00000115073	2	97655963	ACTR1B	-1.12141	0.0418028
ENSG00000138758	4	76949703	SEPT11	0.766039	0.0419071
ENSG00000131043	20	36236459	AAR2	-0.641071	0.041916
ENSG00000161671	19	50476400	EMC10	-0.989789	0.041916
ENSG00000198324	12	111360651	FAM109A	-1.32426	0.041916
ENSG00000138738	4	120684919	PRDM5	2.03577	0.0420447
ENSG00000170044	3	102099244	ZPLD1	0.987264	0.0420843
ENSG00000204406	2	148021011	MBD5	0.532727	0.0421574
ENSG00000089639	19	19629476	GMIP	-0.927724	0.0421574
ENSG00000178307	17	21197280	TMEM11	-1.24036	0.0421574
ENSG00000183207	19	48993448	RUVBL2	-1.77989	0.0422083
ENSG00000133247	19	55339853	SUV420H2	-2.25603	0.0422083
ENSG00000184221	21	33070144	OLIG1	-2.90896	0.0422083
ENSG00000178950	4	849276	GAK	-0.881857	0.0423474
ENSG00000177694	3	174438573	NAALADL2	1.23826	0.0424505
ENSG00000105939	7	139043520	ZC3HAV1	0.647556	0.0424505
ENSG00000101246	20	63698642	ARFRP1	-1.27541	0.0425594
ENSG00000104805	19	48900050	NUCB1	-1.44755	0.0425594
ENSG00000105701	19	18531751	FKBP8	-2.07326	0.042571
ENSG00000130723	9	131394093	PRRC2B	-0.73156	0.0427053
ENSG00000141456	17	4669774	PELP1	-1.04596	0.0427053
ENSG00000104907	19	13104902	TRMT1	-1.6224	0.0427053
ENSG00000225931	1	2566410		-3.06962	0.0427065
ENSG00000185507	11	612553	IRF7	-2.39853	0.0436219
ENSG00000132612	16	69311356	VPS4A	-0.892555	0.0437383
ENSG00000141295	17	47837692	SCRN2	-2.10511	0.0438408
ENSG00000204386	6	31857659	NEU1	-0.63574	0.0439103
ENSG00000100055	22	37282027	CYTH4	-1.07216	0.0439411
ENSG00000273783	14	81221218		1.01968	0.0439939
ENSG00000233834	7	20217577		0.80628	0.0440565
ENSG00000168159	1	228487061	RNF187	-0.94451	0.0440565
ENSG00000162910	1	228106679	MRPL55	-1.78422	0.0440565
ENSG00000064545	19	19119169	TMEM161A	-2.30308	0.0440565
ENSG00000164713	7	98252379	BRI3	-0.717325	0.0441958
ENSG00000013563	X	154401238	DNASE1L1	-0.89542	0.0441958
ENSG00000227057	6	33279108	WDR46	-0.936641	0.0441958
ENSG00000128604	7	128937612	IRF5	-0.960952	0.0441958
ENSG00000185262	17	76265202	UBALD2	-1.11945	0.0441958
ENSG00000018280	2	218382029	SLC11A1	-1.16193	0.0441958
ENSG00000168961	17	27629798	LGALS9	-1.19169	0.0441958
ENSG00000185033	15	90160604	SEMA4B	-1.44896	0.0441958
ENSG00000267586	18	42159283	LINC00907	1.20298	0.044229
ENSG00000101605	18	3066807	MYOM1	0.948465	0.0442377
ENSG00000167526	16	89560657	RPL13	-0.731476	0.0442408
ENSG00000005882	17	50094737	PDK2	-1.32656	0.0443386
ENSG00000130511	19	18418864	SSBP4	-1.50772	0.0443386
ENSG00000183751	16	1972037	TBL3	-2.24685	0.0443386
ENSG00000183401	19	11344684	CCDC159	-0.937026	0.0443707
ENSG00000126903	X	154487306	SLC10A3	-1.59272	0.0444967
ENSG00000116685	1	11919591	KIAA2013	-1.16522	0.0445338
ENSG00000021645	14	78242391	NRXN3	2.86396	0.0447195
ENSG00000130402	19	38647649	ACTN4	-0.913755	0.0449858
ENSG00000105662	19	18683677	CRTC1	-0.913318	0.0451075
ENSG00000063176	19	48619291	SPHK2	-2.23598	0.0451075
ENSG00000105810	7	92604921	CDK6	0.753178	0.0452777
ENSG00000197070	9	137605654	ARRDC1	-1.39567	0.0452777
ENSG00000125510	20	64080173	OPRL1	-2.32528	0.0453444
ENSG00000177989	22	50529710	ODF3B	-2.32687	0.0453688
ENSG00000105220	19	34359480	GPI	-0.719566	0.0454422
ENSG00000157796	4	39182404	WDR19	0.773129	0.0455908
ENSG00000164086	3	52048919	DUSP7	-1.59274	0.0456246
ENSG00000204592	6	30489467	HLA-E	-0.727798	0.0457422
ENSG00000116584	1	155946851	ARHGEF2	-0.794572	0.0457727
ENSG00000169718	17	82057506	DUS1L	-1.52505	0.0458029
ENSG00000125844	20	17613678	RRBP1	-0.742663	0.0458852
ENSG00000114767	3	51933430	RRP9	-1.79102	0.0458852
ENSG00000112561	6	41683978	TFEB	-0.82992	0.0460977
ENSG00000163702	3	9917074	IL17RC	-1.57011	0.0461257
ENSG00000134531	12	13196716	EMP1	1.40053	0.0461937
ENSG00000160446	9	128720869	ZDHHC12	-2.58723	0.0462259
ENSG00000171659	X	41688973	GPR34	1.38718	0.046293
ENSG00000178217	10	80537902	SH2D4B	1.33154	0.046293
ENSG00000090273	1	26900238	NUDC	-0.918508	0.046293
ENSG00000178188	16	28846600	SH2B1	-1.40313	0.046293
ENSG00000100359	22	40370591	SGSM3	-1.79827	0.046293
ENSG00000145349	4	113451032	CAMK2D	0.971454	0.0464081
ENSG00000168040	11	70203163	FADD	-0.97473	0.0464081
ENSG00000099341	19	38374536	PSMD8	-0.596483	0.0464401
ENSG00000184076	22	29767369	UQCR10	-0.933819	0.0464401
ENSG00000125652	19	6372433	ALKBH7	-2.1571	0.0464401
ENSG00000141971	19	17405722	MVB12A	-1.51601	0.0465523
ENSG00000164292	5	95713522	RHOBTB3	1.07111	0.0466628
ENSG00000105058	19	16185380	FAM32A	-0.81663	0.0472071
ENSG00000162066	16	2520357	AMDHD2	-2.42219	0.0472297
ENSG00000106012	7	2558972	IQCE	-1.04122	0.0472792
ENSG00000143761	1	228082660	ARF1	-0.818284	0.0476055
ENSG00000103335	16	88715343	PIEZO1	-1.45713	0.0476055
ENSG00000172613	11	67317871	RAD9A	-1.22824	0.047698
ENSG00000108963	17	2030110	DPH1	-1.27126	0.0477194
ENSG00000167645	19	38305104	YIF1B	-1.55044	0.0477593
ENSG00000158517	7	74773962	NCF1	-1.32257	0.0479051
ENSG00000165801	14	21070270	ARHGEF40	-1.06584	0.0481259
ENSG00000100403	22	41301522	ZC3H7B	-1.18543	0.0481259
ENSG00000156313	X	38269163	RPGR	0.810463	0.0483054
ENSG00000156873	16	30748270	PHKG2	-0.920706	0.0483054
ENSG00000006015	19	18588685	C19orf60	-1.75395	0.0483054
ENSG00000141349	17	44070735	G6PC3	-1.27715	0.0484231
ENSG00000172543	11	65879809	CTSW	-1.38627	0.0484231
ENSG00000177156	11	747329	TALDO1	-1.17498	0.0486215
ENSG00000267047	17	6985494		-0.932246	0.0487062
ENSG00000176454	15	34358618	LPCAT4	-1.46517	0.0487231
ENSG00000099800	19	2425624	TIMM13	-2.14565	0.0488416
ENSG00000041515	13	108596152	MYO16	1.19639	0.0488487
ENSG00000133030	17	17042545	MPRIP	-0.71311	0.0488487
ENSG00000214063	11	842808	TSPAN4	-1.84818	0.0488487
ENSG00000266074	17	81395475	BAHCC1	-2.00543	0.0488487
ENSG00000207357	19	1021522	RNU6-2	-1.15056	0.0490359
ENSG00000170265	7	149195485	ZNF282	-1.35734	0.0490359
ENSG00000188676	8	39934614	IDO2	1.1659	0.0490953
ENSG00000104219	8	17156029	ZDHHC2	0.526187	0.0493266
ENSG00000132182	3	13316235	NUP210	-0.824779	0.0493266
ENSG00000104522	8	143612618	TSTA3	-1.13488	0.0493804
ENSG00000271780	14	101948347		-1.89136	0.0495189
ENSG00000081791	5	141923808	KIAA0141	-0.620972	0.0495295
ENSG00000187688	17	16415542	TRPV2	-1.0395	0.0495295
ENSG00000105404	19	41956681	RABAC1	-1.57953	0.0495295
ENSG00000146828	7	100826820	SLC12A9	-1.77117	0.0495295
ENSG00000100292	22	35380361	HMOX1	-0.908852	0.0496665
ENSG00000106628	7	44114681	POLD2	-1.40122	0.0496665
ENSG00000235499	2	73985132		-1.22273	0.0498776
ENSG00000141505	17	7173431	ASGR1	-1.73454	0.0498776

## Sheet: B. Mossi +P.fal v Mossi -P.fal
Ensembl gene ID	Chr	Start	Gene symbol	log2FC	Adjusted p-value		B. Significantly DE genes in Mossi +P.fal relative to Mossi –P.fal.
ENSG00000156113	10	76869601	KCNMA1	-4.42346	0.0015064
ENSG00000258763	12	55434734	ENSG00000258763	-5.59954	0.024674
ENSG00000166762	15	43628503	CATSPER2	3.8439	0.0325941

## Sheet: C. Fulani +P.fal v Mossi -P.fal
Ensembl gene ID	Chr	Start	Gene symbol	log2FC	Adjusted p-value		C. Significantly DE genes in Fulani +P.fal relative to Mossi +P.fal.
ENSG00000166762	3	43628503	CATSPER2	4.82909	0.00072288
ENSG00000224870	1	1399522	ENSG00000224870	-3.76655	0.046435
ENSG00000169689	17	82018702	STRA13	-2.85519	0.046435
ENSG00000235782	1	70947379	ENSG00000235782	2.67174	0.046435
ENSG00000107518	10	115093365	ATRNL1	2.70099	0.046435
ENSG00000198963	9	74497365	RORB	3.43122	0.046435
ENSG00000233723	2	58427799	LINC01122	4.80775	0.046679
ENSG00000250061	5	163012265	ENSG00000250061	1.46644	0.0480916

## Sheet: D. Inflammasome DE genes
D. List of inflammasome related significantly DE genes in monocytes of Fulani +P.fal relative to Fulani –P.fal (adjusted p-value < 0.05).
		Fulani -P.fal		Fulani +P.fal		Fulani +P.fal		Mossi +P.fal
		v		v		v		v
		Mossi -P.fal		Mossi +P.fal		Fulani -P.fal		Mossi -P.fal
Gene		log2FC	adjusted p-value	log2FC	adjusted p-value	log2FC	adjusted p-value	log2FC	adjusted p-value
P2RX7	Purinergic receptor P2X, ligand gated ion channel, 7	1.0007	0.0012	0.4394	0.4214	0.1321	0.7954	-0.4292	0.9998
CTSD	Cathepsin D	0.1091	0.9515	-1.7965	0.0778	2.1635	0.0037	0.2579	0.9998
CTSW	Cathepsin W	-0.0866	0.9617	-1.4543	0.1389	1.3863	0.0484	0.0185	0.9998
PSTPIP1	PSTP- interacting protein 1	0.2863	0.8548	-1.6523	0.1214	2.3023	0.0074	0.3638	0.9998
NLRC5	NLR family, CARD domain containing 5	0.1297	0.8856	-0.6357	0.2503	0.8744	0.0234	0.1089	0.9998
NLRP12	NLR family, pyrin domain containing 12	0.2001	0.8809	-1.0042	0.2138	1.202	0.0381	-0.0022	0.9998
NLRX1	NLR family, X1	0.8157	0.5884	-1.3809	0.2518	1.7874	0.038	-0.4092	0.9998
CARD9	Caspase recruitment domain family, 9	0.728	0.6983	-1.4348	0.3088	2.352	0.0207	0.1892	0.9998
GSDMD	Gasdermin D	0.3694	0.8528	-1.7938	0.1742	2.1568	0.0284	-0.0063	0.9998

## Sheet: E. TF binding sites at DE genes
Transcription Factor	# genes	% genes	Adjusted p-value		E. List of transcription factor binding sites enriched at significantly DE genes in Fulani +P.fal relative to Fulani –P.fal
AP4	892	74.8	6.9e-71
PAX5	820	68.7	1e-69
HEN1	834	69.9	1.5e-68
MYOGNF1	709	59.4	1e-61
OLF1	679	56.9	1.5e-56
E47	824	69.1	9.9e-54
ELK1	716	60	1.1e-51
NRSF	748	62.7	1.4e-51
MYCMAX	834	69.9	1.9e-49
AHRARNT	734	61.5	1.1e-48
TAXCREB	749	62.8	3.8e-48
GATA2	544	45.6	2e-47
MYOD	753	63.1	1.8e-45
USF	781	65.5	1.5e-44
ER	701	58.8	2.5e-43
ROAZ	648	54.3	2.5e-43
P53	842	70.6	1.3e-42
CP2	581	48.7	1.4e-42
ARNT	668	56	2.1e-42
ZID	664	55.7	5.5e-42
RREB1	569	47.7	6.2e-42
XBP1	682	57.2	3.4e-41
CREB	615	51.6	3.7e-41
HMX1	641	53.7	3.8e-41
AHR	513	43	9.5e-41
YY1	876	73.4	2e-39
NRF2	468	39.2	7.8e-39
ZIC3	562	47.1	1.4e-38
AP2REP	621	52.1	1.2e-37
SP1	405	33.9	3.2e-37
MZF1	658	55.2	7.1e-37
NMYC	475	39.8	9.4e-36
SREBP1	770	64.5	2.1e-35
CMYB	594	49.8	3.1e-35
PAX2	751	63	1.1e-34
ATF6	625	52.4	2.4e-34
SEF1	674	56.5	3.4e-34
ARP1	640	53.6	5.8e-34
COMP1	658	55.2	4.1e-33
MIF1	579	48.5	2.8e-32
CETS1P54	392	32.9	8.4e-32
AP2	394	33	2.4e-31
NFKAPPAB50	358	30	6.1e-31
PPARA	697	58.4	1e-30
NGFIC	440	36.9	3.3e-29
MAZR	341	28.6	1.1e-28
PPARG	946	79.3	1.7e-28
P300	515	43.2	4.2e-28
NF1	514	43.1	6.2e-28
HNF4	623	52.2	2.6e-27
ATF	451	37.8	4.4e-26
E2F	708	59.3	1.5e-25
NFKB	632	53	2.1e-25
HOX13	589	49.4	2.3e-25
ZIC2	356	29.8	3.1e-25
AREB6	962	80.6	5.7e-25
SPZ1	446	37.4	2.1e-24
LUN1	625	52.4	1.3e-23
LMO2COM	715	59.9	2.8e-23
PAX3	558	46.8	6e-22
EGR3	264	22.1	4.8e-20
GCNF	686	57.5	5.4e-20
STAT3	585	49	1.2e-19
NFKAPPAB	461	38.6	8.3e-19
PAX4	878	73.6	1.3e-17
COUP	512	42.9	8.9e-16
TAL1BETAE47	380	31.9	2.9e-15
AP2GAMMA	175	14.7	1.2e-14
GRE	565	47.4	2.1e-14
GR	612	51.3	3.8e-14
RFX1	698	58.5	2.1e-13
HTF	624	52.3	2.5e-13
TCF11MAFG	610	51.1	3.1e-13
TAL1BETAITF2	616	51.6	1.7e-12
MYB	531	44.5	2.8e-12
NFY	568	47.6	5.4e-12
STAT1	473	39.6	1.8e-11
AP1FJ	368	30.8	4.2e-11
TAL1ALPHAE47	269	22.5	4.5e-11
RP58	592	49.6	6.3e-11
HAND1E47	534	44.8	1.1e-10
AML1	842	70.6	1.5e-10
CDPCR3HD	517	43.3	4.6e-10
TCF11	575	48.2	8.5e-10
BACH2	493	41.3	1.6e-09
SRF	772	64.7	1.8e-09
CHOP	542	45.4	2.5e-09
EGR1	119	10	2e-08
NFE2	409	34.3	3.7e-08
STAT5A	628	52.6	7.7e-08
GATA3	282	23.6	1.4e-07
ZIC1	185	15.5	1.4e-07
EGR2	120	10.1	2.1e-06
IK2	342	28.7	2.1e-06
CDPCR3	590	49.5	2.1e-06
MAX	212	17.8	2.2e-06
BACH1	543	45.5	2.9e-06
NCX	490	41.1	3.2e-06
NFKAPPAB65	259	21.7	3.3e-06
LYF1	428	35.9	5e-06
IK1	387	32.4	3.2e-05
MEIS1	496	41.6	4.4e-05
BRACH	582	48.8	5.4e-05
AP1	627	52.6	5.7e-05
PAX6	570	47.8	0.00016
IK3	465	39	0.00038
CDPCR1	411	34.5	0.0004
CREBP1CJUN	151	12.7	0.0026
FAC1	486	40.7	0.0045
RORA1	459	38.5	0.0048
CEBP	779	65.3	0.0082
HSF2	426	35.7	0.0086
GATA1	823	69	0.0095
HSF1	305	25.6	0.038
CREL	169	14.2	0.046
EN1	524	43.9	0.14
