# Supplementary figures and images for: Major transcriptional changes observed in the Fulani, an ethnic group less susceptible to malaria
Source: eLife journal article supplement (doi:10.7554/elife.29156), 2017-09-18

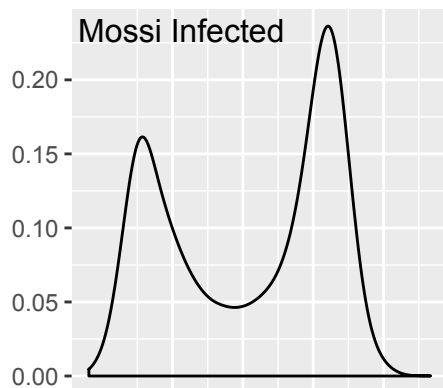

Corr:  
0.99

Corr:  
0.996

Corr:  
0.996

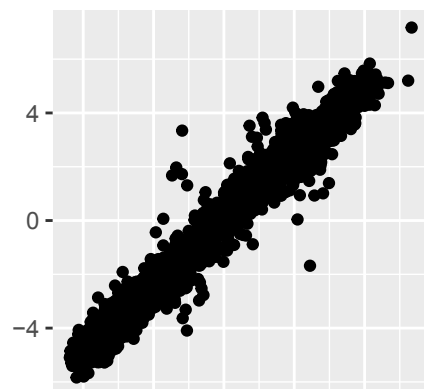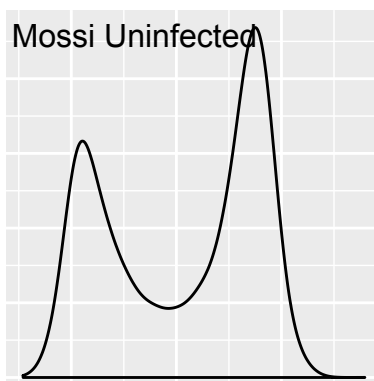

Corr:  
0.996

Corr:  
0.996

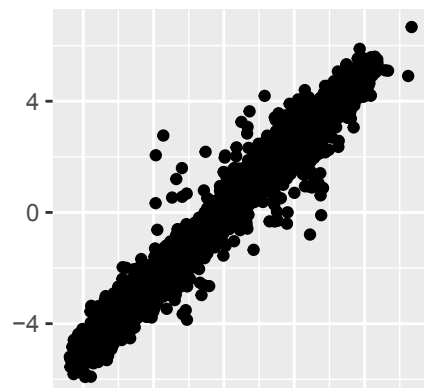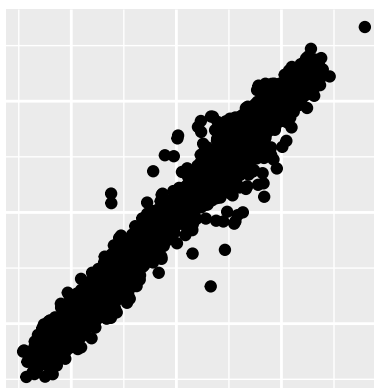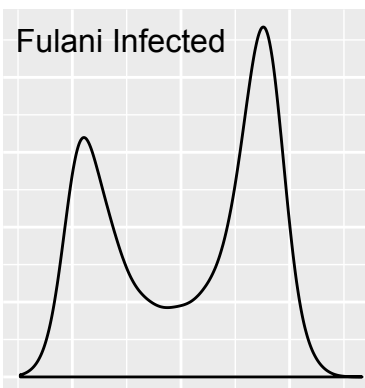

Corr:  
0.996

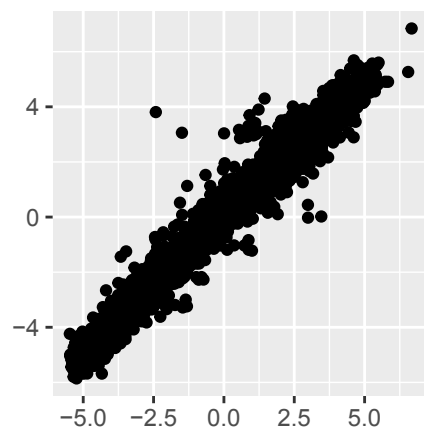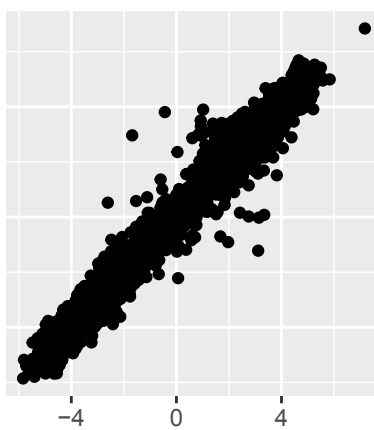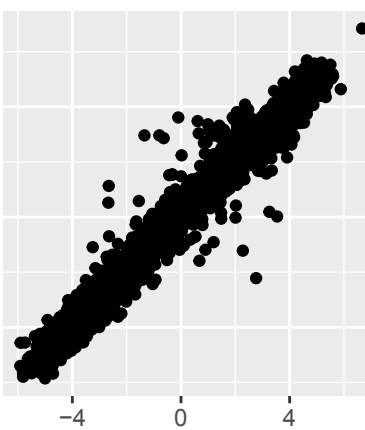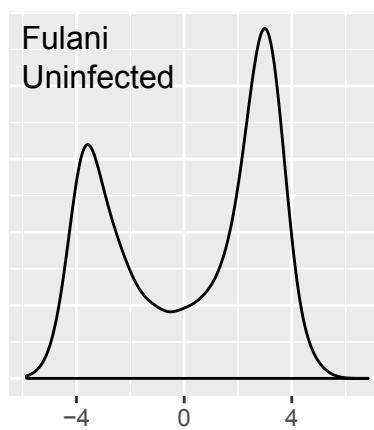

Supplement: supp [file elife-29156-supp-v1.zip]
